# Supplementary material for: NET Proteome in Established Type 1 Diabetes Is Enriched in Metabolic Proteins
Source: Cells. 2023 May 5;12(9):1319. doi: 10.3390/cells12091319 (PMC10177393; doi:10.3390/cells12091319)
Supplement: Supplementary file 1 [file cells-12-01319-s001.zip › Supplementary tables- Neutrophils and type 1 diabetes - Cells.xlsx]

## Sheet: Table S1
			Normalized Total Spectral Counts
			Healthy controls			T1D
Protein description	Accession Number	Gene name	HC1	HC2	HC3	T1D1	T1D2	T1D3	T1D4
1,4-alpha-glucan branching enzyme	B4DUF1	N/A	3.2483	1.7117	3.4215	1.9173	1.0854	2.2158	0.85899
1,4-beta-N-acetylmuramidase C GN=LYZ	B2R4C5	LYZ	14.076	11.126	21.67	9.5863	10.854	9.9712	11.167
14 kDa phosphohistidine phosphatase GN=PHP14	Q6FIE5	PHP14	0	0.85586	2.281	0.95863	1.0854	1.1079	0
14-3-3 protein beta/alpha GN=YWHAB	B5BU24	YWHAB	9.7448	5.991	9.124	3.8345	7.598	3.3237	8.5899
2-phospho-D-glycerate hydro-lyase GN=HEL-S-17	A0A024R4F1	HEL-S-17	30.317	30.811	23.951	31.635	43.417	46.532	36.077
40S ribosomal protein S27a (Fragment)	A0A248RGE3	N/A	1.0828	3.4234	5.7025	1.9173	2.1708	2.2158	4.2949
6-phosphogluconate dehydrogenase, decarboxylating	B4DL86	N/A	23.821	13.694	13.686	13.421	20.623	17.727	17.18
6-phosphogluconate dehydrogenase, decarboxylating GN=PGD	P52209	PGD	37.897	24.82	23.951	25.883	33.648	29.914	29.206
92 kDa gelatinase	B7Z507	N/A	0	0.85586	4.562	0	0	0	0
ACTA2 protein (Fragment) GN=ACTA2	Q13707	ACTA2	0	0	0	0	85.749	86.417	52.398
Actin, cytoplasmic 1 GN=ACTB	A0A6Q8PFE4	ACTB	149.42	128.38	120.89	179.26	223.6	232.66	190.69
Actin, cytoplasmic 1 (Fragment) GN=ACTB	A0A2R8YFE2	ACTB	19.49	17.973	12.546	16.297	26.05	29.914	22.334
Actin, cytoplasmic 1 (Fragment) GN=ACTB	A0A2R8YGF8	ACTB	49.807	54.775	52.463	73.814	98.774	114.12	75.591
Actin, cytoplasmic 1 (Fragment) GN=ACTB	A0A2R8YEA7	ACTB	63.883	53.919	51.323	75.732	87.919	86.417	77.309
Actin-depolymerizing factor	B7Z992	N/A	11.91	20.541	12.546	17.255	24.965	26.59	24.911
Actin-depolymerizing factor	B7Z2X4	N/A	9.7448	16.261	9.124	14.379	22.794	24.374	20.616
Actinin alpha 4 isoform 1 (Fragment) GN=ACTN4	A0A0S2Z3G9	ACTN4	27.069	31.667	18.248	22.048	34.734	35.453	34.359
Actinin, alpha 1, isoform CRA_a GN=ACTN1	A0A024R694	ACTN1	54.138	64.19	50.182	47.931	72.723	68.691	63.565
Actin-like protein 3 GN=ACTR3	A0A024RAI1	ACTR3	17.324	20.541	9.124	16.297	22.794	18.835	19.757
Actin-related protein 2 GN=ACTR2	P61160	ACTR2	12.993	11.126	4.562	12.462	15.196	12.187	12.885
Actin-related protein 2/3 complex subunit GN=ARPC1B	A4D275	ARPC1B	12.993	12.838	6.843	11.504	8.6834	11.079	11.167
Actin-related protein 2/3 complex subunit 2 GN=ARPC2	O15144	ARPC2	6.4966	7.7027	3.4215	5.7518	6.5125	8.8633	5.1539
Actin-related protein 2/3 complex subunit 3	B2R4D5	N/A	3.2483	2.5676	3.4215	1.9173	2.1708	2.2158	0.85899
Actin-related protein 2/3 complex subunit 4 GN=ARPC4	P59998	ARPC4	10.828	8.5586	6.843	5.7518	9.7688	8.8633	6.0129
Actin-related protein 2/3 complex subunit 5 GN=ARPC5	O15511	ARPC5	6.4966	5.1352	2.281	3.8345	4.3417	8.8633	2.577
Adenylosuccinate synthetase isozyme 2 GN=ADSS	A0A024R5Q7	ADSS	1.0828	2.5676	1.1405	1.9173	6.5125	5.5396	6.0129
Adenylyl cyclase-associated protein 1	B4DI38	N/A	10.828	11.982	6.843	14.379	20.623	15.511	15.462
ADP-ribosylation factor 3, isoform CRA_b GN=ARF3	A0A024R0Y6	ARF3	3.2483	1.7117	1.1405	0.95863	0	0	1.718
ADP-ribosylation factor 5 GN=ARF5	A4D0Z3	ARF5	2.1655	1.7117	0	0	0	0	1.718
Aflatoxin B1 aldehyde reductase member 4 GN=AKR7L	A0A499FJT0	AKR7L	1.0828	0	1.1405	0.95863	0	0	0
AIF1	A0A1U9X791	N/A	3.2483	0.85586	0	1.9173	0	1.1079	1.718
Albumin GN=ALB	P02768	ALB	134.26	255.9	277.14	181.18	168.24	151.78	192.41
Albumin (Fragment)	F6KPG5	N/A	118.02	225.09	247.49	165.84	150.87	134.06	161.49
Aldehyde dehydrogenase family 16 member A1 GN=ALDH16A1	Q8IZ83	ALDH16A1	1.0828	0.85586	1.1405	0	1.0854	0	1.718
Aldo-keto reductase family 1 member A1 GN=AKR1A1	P14550	AKR1A1	1.0828	0.85586	0	0	0	1.1079	0
Alpha-1-acid glycoprotein 1 GN=ORM1	P02763	ORM1	1.0828	3.4234	3.4215	1.9173	1.0854	1.1079	2.577
Alpha-1-antitrypsin GN=SERPINA1	A0A024R6I7	SERPINA1	7.5793	24.82	33.075	4.7931	13.025	3.3237	14.603
Alpha-2-HS-glycoprotein	B7Z8Q2	N/A	0	0.85586	1.1405	0.95863	1.0854	1.1079	0
Alpha-2-macroglobulin GN=A2M	P01023	A2M	6.4966	30.811	37.637	0.95863	2.1708	0	15.462
Aminopeptidase	B7Z4B2	N/A	1.0828	2.5676	1.1405	0.95863	2.1708	1.1079	2.577
Aminopeptidase B GN=RNPEP	Q7RU04	RNPEP	2.1655	3.4234	4.562	1.9173	1.0854	2.2158	0
AMP deaminase 3 GN=AMPD3	Q01432	AMPD3	1.0828	2.5676	0	0.95863	0	1.1079	2.577
Annexin	B7Z6L0	N/A	2.1655	3.4234	4.562	1.9173	4.3417	2.2158	3.4359
Annexin	A0A4D5RAU4	N/A	42.228	50.496	39.918	46.014	55.357	60.935	47.244
Annexin	B2R7L2	N/A	2.1655	0	4.562	2.8759	5.4271	1.1079	4.2949
Annexin (Fragment) GN=ANXA6	A0A0S2Z2Z6	ANXA6	10.828	23.108	29.653	18.214	34.734	23.266	34.359
Annexin A1 GN=ANXA1	P04083	ANXA1	47.641	69.325	52.463	85.318	96.603	99.712	70.437
Annexin A3 GN=ANXA3	P12429	ANXA3	33.566	40.225	42.199	45.056	61.869	50.964	46.385
Annexin A4 GN=ANXA4	P09525	ANXA4	10.828	11.982	11.405	9.5863	17.367	11.079	18.039
Annexin A5 GN=ANXA5	P08758	ANXA5	11.91	10.27	18.248	12.462	20.623	14.403	24.052
Anti-(ED-B) scFV (Fragment)	A2KBB9	N/A	0	1.7117	2.281	0	0	0	1.718
Antibacterial peptide FALL-39	A0A384NPR0	N/A	0	2.5676	13.686	2.8759	4.3417	2.2158	7.7309
Apolipoprotein A-I, isoform CRA_a GN=APOA1	A0A024R3E3	APOA1	1.0828	6.8469	4.562	0.95863	2.1708	1.1079	4.2949
Apolipoprotein B (Including Ag(X) antigen) GN=APOB	C0JYY2	APOB	0	1.7117	2.281	0	0	0	0
Apolipoprotein B receptor GN=APOBR	A0A4V7I447	APOBR	0	1.7117	2.281	0	0	2.2158	0
Apolipoprotein H GN=APOH	A0A384NKM6	APOH	0	3.4234	3.4215	0.95863	2.1708	0	2.577
Apoptosis regulator BAX GN=BAX	Q07812	BAX	0	0	0	0	1.0854	1.1079	0.85899
Apoptosis-associated speck-like protein containing a CARD GN=PYCARD	Q9ULZ3	PYCARD	5.4138	5.1352	4.562	3.8345	3.2563	3.3237	4.2949
Arginase-1 GN=ARG1	P05089	ARG1	0	0.85586	1.1405	5.7518	5.4271	5.5396	0.85899
ATP-citrate synthase GN=ACLY	A0A024R1T9	ACLY	2.1655	2.5676	0	0.95863	0	1.1079	0.85899
ATP-dependent 6-phosphofructokinase, liver type GN=PFKL	P17858	PFKL	2.1655	2.5676	1.1405	0.95863	1.0854	0	2.577
Azurocidin GN=AZU1	P20160	AZU1	11.91	9.4145	15.967	4.7931	5.4271	4.4317	7.7309
Beta actin (Fragment)	K4ENJ5	N/A	22.738	20.541	23.951	31.635	36.904	31.022	19.757
Beta-1 metal-binding globulin	B4E1B2	N/A	5.4138	47.072	36.496	13.421	13.025	7.7554	24.052
Beta-actin-like protein 2 GN=ACTBL2	Q562R1	ACTBL2	30.317	35.946	27.372	41.221	49.93	48.748	27.488
Beta-globin GN=HBB	D9YZU5	HBB	14.076	17.117	21.67	14.379	24.965	16.619	4.2949
Beta-globin (Fragment) GN=HBB	Q9GZL9	HBB	14.076	15.405	19.389	14.379	23.879	16.619	4.2949
Beta-globin (Fragment) GN=HBB	A0A2S1CVU8	HBB	6.4966	7.7027	11.405	8.6277	13.025	9.9712	2.577
BH3-interacting domain death agonist GN=BID	A8ASI8	BID	0	1.7117	1.1405	0.95863	1.0854	1.1079	0
Brain acid soluble protein 1 GN=BASP1	P80723	BASP1	5.4138	5.991	1.1405	2.8759	7.598	7.7554	6.0129
C4a anaphylatoxin GN=C4B_2	A0A0G2JL54	C4B_2	0	3.4234	4.562	0	1.0854	0	2.577
Calcium-activated neutral proteinase 1 GN=CAPN1	A0A024R580	CAPN1	5.4138	2.5676	2.281	1.9173	1.0854	2.2158	2.577
Calcium-activated neutral proteinase small subunit (Fragment) GN=CAPNS1	A0A075B7C0	CAPNS1	1.0828	0.85586	1.1405	0.95863	1.0854	1.1079	0
Calponin (Fragment) GN=CNN2	A0A087X271	CNN2	2.1655	0	1.1405	0	1.0854	0	0.85899
CapZ-interacting protein GN=RCSD1	B7ZKW8	RCSD1	0	0.85586	1.1405	0.95863	0	1.1079	0.85899
Carbonic anhydrase (Fragment) GN=CA1	E5RFE7	CA1	1.0828	0.85586	0	0	0	0	0
Carcinoembryonic antigen-related cell adhesion molecule 8 GN=CEACAM8	P31997	CEACAM8	0	0.85586	2.281	0	0	0	1.718
Catalase	A0A384P5Q0	N/A	22.738	29.099	11.405	22.048	11.94	31.022	11.167
Cathepsin G GN=CTSG	P08311	CTSG	12.993	9.4145	14.827	6.7104	8.6834	7.7554	6.8719
cDNA FLJ14168 fis, clone NT2RP2001440, highly similar to 14-3-3 protein gamma	B3KNB4	N/A	2.1655	5.991	4.562	4.7931	4.3417	2.2158	5.1539
cDNA FLJ36535 fis, clone TRACH2004521	B3KSL3	N/A	0	2.5676	1.1405	0	0	0	0
cDNA FLJ52146, highly similar to Grancalcin	B7Z322	N/A	2.1655	4.2793	3.4215	2.8759	4.3417	4.4317	3.4359
cDNA FLJ52970, highly similar to Ras-related protein Rab-8B	B4DMS1	N/A	1.0828	1.7117	0	0	2.1708	0	2.577
cDNA FLJ53075, highly similar to Kininogen-1	B4DPP8	N/A	0	2.5676	1.1405	0.95863	0	0	0.85899
cDNA FLJ53662, highly similar to Actin, alpha skeletal muscle	B7Z6P1	N/A	76.876	77.883	75.273	104.49	142.19	157.32	103.94
cDNA FLJ53963, highly similar to Leukocyte elastase inhibitor	B4E3A8	N/A	55.221	50.496	53.604	30.676	39.075	47.64	43.808
cDNA FLJ54111, highly similar to Serotransferrin	B4DI57	N/A	7.5793	41.081	37.637	12.462	13.025	7.7554	25.77
cDNA FLJ60461, highly similar to Peroxiredoxin-2	B4DF70	N/A	0	0.85586	5.7025	0.95863	0	0	0.85899
cDNA FLJ75699, highly similar to osteoclast stimulating factor 1 (OSTF1), mRNA	A8K646	N/A	2.1655	3.4234	0	4.7931	2.1708	3.3237	1.718
cDNA FLJ76079, highly similar to lymphocyte-specific protein 1 (LSP1), mRNA	A8K2L4	N/A	2.1655	4.2793	1.1405	3.8345	3.2563	5.5396	6.0129
cDNA FLJ77640, highly similar to copine II (CPNE2), mRNA	A8K8A4	N/A	1.0828	0	1.1405	0	0	0	1.718
cDNA FLJ77680, highly similar to protein phosphatase 2 (formerly 2A), regulatory subunit A (PR 65), alpha isoform (PPP2R1A), mRNA	A8K3H8	N/A	1.0828	0.85586	0	0	0	0	0
cDNA FLJ77744, highly similar to kallikrein B, plasma (Fletcher factor) 1 (KLKB1), mRNA	A8K9A9	N/A	0	0.85586	1.1405	0	0	0	0
cDNA, FLJ92583, highly similar to glycogenin (GYG), mRNA	B2R5R5	N/A	1.0828	4.2793	4.562	4.7931	5.4271	4.4317	4.2949
cDNA, FLJ93914, highly similar to histidine-rich glycoprotein (HRG), mRNA	B2R8I2	N/A	0	2.5676	1.1405	0	0	0	1.718
cDNA, FLJ95650, highly similar to karyopherin (importin) beta 1 (KPNB1), mRNA	B2RBR9	N/A	1.0828	2.5676	0	0	1.0854	0	0.85899
cDNA, FLJ95846, highly similar to serpin peptidase inhibitor, clade B (ovalbumin), member 10 (SERPINB10), mRNA	B2RC45	N/A	20.572	8.5586	17.108	9.5863	4.3417	14.403	4.2949
cDNA, FLJ96792, highly similar to calmodulin 2 (phosphorylase kinase, delta) (CALM2), mRNA	B2RDW0	N/A	4.331	5.991	13.686	3.8345	4.3417	6.6475	0.85899
Chloride intracellular channel protein	A0A1U9X8Y4	N/A	16.241	18.829	13.686	15.338	15.196	13.295	18.039
Chromobox homolog 3 (HP1 gamma homolog, Drosophila) GN=CBX3	A4D177	CBX3	0	0	0	2.8759	1.0854	3.3237	1.718
Chromosome 11 open reading frame 54, isoform CRA_a GN=C11orf54	A0A024R396	C11orf54	0	0.85586	1.1405	0.95863	0	1.1079	0
Clathrin heavy chain GN=CLTC	A0A087WVQ6	CLTC	7.5793	10.27	5.7025	6.7104	7.598	5.5396	14.603
Coatomer subunit beta (Fragment) GN=COPB1	E9PP73	COPB1	1.0828	1.7117	0	0	0	0	0
Cofilin, non-muscle isoform GN=CFL1	E9PK25	CFL1	6.4966	7.7027	4.562	12.462	11.94	13.295	7.7309
Complement C3 GN=C3	P01024	C3	7.5793	18.829	25.091	4.7931	7.598	3.3237	10.308
Component 3 of promoter of RISC GN=TSN	B3KRM8	TSN	1.0828	0.85586	0	0	0	0	0.85899
Copine III, isoform CRA_a GN=CPNE3	A0A024R994	CPNE3	1.0828	1.7117	2.281	0	2.1708	1.1079	3.4359
Core histone macro-H2A.1 GN=MACROH2A1	O75367	MACROH2A1	0	0.85586	0	0.95863	1.0854	1.1079	1.718
Coronin GN=CORO1A	A0A024R611	CORO1A	17.324	20.541	19.389	21.09	20.623	22.158	18.039
Coronin GN=CORO1C	A0A024RBI5	CORO1C	1.0828	0.85586	0	0	1.0854	2.2158	1.718
CP protein GN=CP	A5PL27	CP	0	19.685	12.546	7.669	8.6834	2.2158	12.885
Cullin-associated NEDD8-dissociated protein 1 (Fragment) GN=CAND1	A0A0C4DGH5	CAND1	3.2483	0.85586	1.1405	0	0	0	0.85899
Cytidine deaminase GN=CDA	P32320	CDA	1.0828	2.5676	5.7025	2.8759	3.2563	4.4317	1.718
Cytochrome c (Fragment) GN=CYCS	C9JFR7	CYCS	1.0828	0	2.281	0	0	0	0
Cytokeratin-1 GN=KRT1	H6VRF8	KRT1	173.24	46.216	30.794	156.26	37.99	47.64	62.706
Cytoplasmic dynein 1 heavy chain 1 GN=DYNC1H1	Q14204	DYNC1H1	1.0828	0.85586	0	0	0	0	0.85899
D-dopachrome decarboxylase GN=DDT	P30046	DDT	1.0828	1.7117	1.1405	1.9173	2.1708	1.1079	0.85899
Delta globin GN=HBD	A0N071	HBD	6.4966	5.991	10.265	4.7931	7.598	4.4317	1.718
DNA-(apurinic or apyrimidinic site) endonuclease GN=APEX1	P27695	APEX1	3.2483	3.4234	1.1405	2.8759	2.1708	3.3237	4.2949
Drebrin-like protein GN=DBNL	Q9UJU6	DBNL	0	1.7117	3.4215	2.8759	1.0854	5.5396	0
Drebrin-like protein GN=DBNL	B4DDD6	DBNL	0	0.85586	1.1405	0.95863	1.0854	3.3237	0
EF-hand domain family, member D2, isoform CRA_a GN=EFHD2	A0A024QZ77	EFHD2	3.2483	5.991	3.4215	6.7104	1.0854	4.4317	5.1539
EH domain-containing protein 1 GN=EHD1	A0A024R571	EHD1	2.1655	1.7117	0	0	0	1.1079	0.85899
Elongation factor 1-gamma GN=EEF1G	P26641	EEF1G	3.2483	2.5676	4.562	1.9173	4.3417	3.3237	3.4359
Eosinophil cationic protein GN=RNASE3	P12724	RNASE3	1.0828	0.85586	9.124	0.95863	1.0854	1.1079	3.4359
Eosinophil peroxidase GN=EPX	P11678	EPX	4.331	2.5676	13.686	2.8759	3.2563	3.3237	3.4359
Epididymis luminal protein 176 GN=HEL-176	V9HVZ7	HEL-176	84.455	77.883	69.571	108.33	126.99	132.95	106.51
Epididymis luminal protein 4 GN=YWHAZ	D0PNI1	YWHAZ	18.407	15.405	15.967	17.255	15.196	14.403	16.321
Epididymis luminal secretory protein 52 GN=EL52	K9JA46	EL52	8.6621	4.2793	6.843	4.7931	6.5125	8.8633	8.5899
Epididymis secretory protein Li 37 GN=HEL-S-37	V9HWJ7	HEL-S-37	69.297	63.334	36.496	65.187	75.98	77.554	50.68
Epididymis secretory sperm binding protein	A0A384MTY2	N/A	4.331	1.7117	2.281	2.8759	1.0854	2.2158	3.4359
Epididymis secretory sperm binding protein	A0A384MEJ3	N/A	1.0828	1.7117	1.1405	0.95863	1.0854	1.1079	2.577
Epididymis secretory sperm binding protein	A0A384N6H1	N/A	2.1655	1.7117	0	2.8759	1.0854	3.3237	5.1539
Epididymis secretory sperm binding protein	A0A384NPW1	N/A	0	0.85586	2.281	0.95863	0	2.2158	0.85899
Epididymis secretory sperm binding protein	A0A384MED8	N/A	1.0828	1.7117	0	0.95863	0	0	0.85899
Epididymis secretory sperm binding protein	A0A384N5Z8	N/A	1.0828	0.85586	1.1405	0	0	1.1079	0
Epididymis secretory sperm binding protein GN=RHOA	A0A024R324	RHOA	0	3.4234	1.1405	2.8759	2.1708	0	2.577
Epididymis secretory sperm binding protein (Fragment)	A0A384ME16	N/A	4.331	5.1352	5.7025	7.669	7.598	5.5396	5.1539
Epididymis secretory sperm binding protein (Fragment) GN=MIF	I4AY87	MIF	1.0828	0.85586	1.1405	0.95863	1.0854	1.1079	0
Exocyst complex component GN=EXOC6B	A0A0U1RRB6	EXOC6B	0	0.85586	1.1405	0	0	0	0.85899
F-actin-capping protein subunit alpha	A8K0T9	N/A	7.5793	3.4234	3.4215	4.7931	5.4271	5.5396	6.8719
F-actin-capping protein subunit beta	A0A384MR50	N/A	16.241	11.982	12.546	11.504	11.94	12.187	11.167
Family with sequence similarity 49, member B, isoform CRA_a GN=FAM49B	A0A024R9G4	FAM49B	6.4966	5.991	1.1405	4.7931	2.1708	4.4317	4.2949
Farnesyl pyrophosphate synthase (Fragment) GN=FDPS	A0A087WVN4	FDPS	1.0828	0	1.1405	0	0	0	0
Fatty acid binding protein 5 (Psoriasis-associated) GN=FABP5	E7DVW5	FABP5	0	0.85586	1.1405	3.8345	1.0854	1.1079	0.85899
Fermitin family homolog 3 GN=FERMT3	Q86UX7	FERMT3	4.331	9.4145	6.843	4.7931	2.1708	5.5396	5.1539
Ferritin GN=FTL	A0A384MDR3	FTL	0	1.7117	2.281	0	0	0	0.85899
Filaggrin-2 GN=FLG2	Q5D862	FLG2	6.4966	0.85586	0	2.8759	0	0	0
Filamin-A GN=FLNA	P21333	FLNA	45.476	59.91	43.339	51.766	67.296	79.77	60.129
Formin-like protein 1 (Fragment) GN=FMNL1	K7EJE6	FMNL1	1.0828	1.7117	1.1405	0	0	0	0
Fructose-bisphosphate aldolase GN=ALDOC	A0A024QZ64	ALDOC	1.0828	5.1352	0	1.9173	4.3417	2.2158	3.4359
Fructose-bisphosphate aldolase A GN=ALDOA	P04075	ALDOA	12.993	11.982	13.686	21.09	30.392	26.59	20.616
Galectin-10 GN=CLC	Q05315	CLC	4.331	6.8469	7.9835	5.7518	4.3417	4.4317	4.2949
GlcNAc kinase	A0A384N6G7	N/A	3.2483	3.4234	2.281	2.8759	4.3417	1.1079	6.0129
Glia maturation factor gamma GN=GMFG	M0QYG8	GMFG	1.0828	0.85586	3.4215	1.9173	1.0854	2.2158	0.85899
Glucosamine-6-phosphate isomerase	A8K3S1	N/A	1.0828	0.85586	1.1405	0	0	0	0
Glucose-6-phosphate 1-dehydrogenase	A0A384NL00	N/A	20.572	19.685	17.108	16.297	23.879	17.727	18.898
Glucose-6-phosphate isomerase GN=GPI	A0A2U3TZU2	GPI	28.152	29.955	22.81	24.924	39.075	36.561	35.218
Glutaredoxin (Thioltransferase), isoform CRA_c GN=GLRX	A0A024RAM2	GLRX	0	0	0	0.95863	1.0854	0	0.85899
Glutathione reductase, mitochondrial GN=GSR	P00390	GSR	8.6621	6.8469	5.7025	5.7518	3.2563	4.4317	8.5899
Glutathione S-transferase P GN=GSTP1	P09211	GSTP1	17.324	16.261	11.405	23.007	17.367	21.05	13.744
Glutathione synthetase GN=GSS	A0A2R8Y430	GSS	2.1655	2.5676	0	0	0	1.1079	0.85899
Glutathione-dependent dehydroascorbate reductase	B2R983	N/A	0	0.85586	0	0.95863	1.0854	2.2158	0
Glyceraldehyde-3-phosphate dehydrogenase GN=GAPDH	P04406	GAPDH	15.159	17.973	9.124	20.131	26.05	24.374	18.898
Glycogen [starch] synthase	A8K6K7	N/A	1.0828	2.5676	1.1405	1.9173	2.1708	2.2158	4.2949
Glycogen phosphorylase, liver form GN=PYGL	P06737	PYGL	20.572	20.541	13.686	21.09	26.05	12.187	32.641
Grancalcin GN=GCA	H7BXD5	GCA	4.331	4.2793	4.562	4.7931	6.5125	3.3237	4.2949
GST class-pi (Fragment) GN=GSTP1	C7DJS2	GSTP1	8.6621	6.8469	4.562	11.504	6.5125	8.8633	4.2949
GTP-binding nuclear protein Ran GN=RAN	B5MDF5	RAN	0	0	1.1405	2.8759	2.1708	1.1079	1.718
Guanine nucleotide binding protein (G protein), beta polypeptide 1, isoform CRA_a GN=GNB1	A0A140VJJ8	GNB1	1.0828	2.5676	0	0	1.0854	0	0.85899
Guanine nucleotide-binding protein G(i) subunit alpha-2 GN=GNAI2	P04899	GNAI2	5.4138	5.991	3.4215	2.8759	10.854	2.2158	6.8719
Guanine nucleotide-binding protein G(i) subunit alpha-3 GN=GNAI3	P08754	GNAI3	1.0828	1.7117	2.281	0	0	0	3.4359
H0YI89|H0YI89_HUMAN-DECOY	H0YI89	N/A	4.331	3.4234	0	1.9173	3.2563	1.1079	0.85899
Haptoglobin GN=HP	H0Y300	HP	4.331	11.126	23.951	5.7518	6.5125	2.2158	4.2949
Haptoglobin (Fragment) GN=HP	H3BS21	HP	3.2483	8.5586	12.546	4.7931	3.2563	0	3.4359
HCG1745306, isoform CRA_a GN=HBA2	G3V1N2	HBA2	3.2483	4.2793	7.9835	2.8759	9.7688	4.4317	0
HCG1991735, isoform CRA_a GN=hCG_1991735	A0A024RC65	hCG_1991735	7.5793	9.4145	10.265	2.8759	3.2563	3.3237	6.0129
HCG2039812, isoform CRA_b (Fragment) GN=KRT6A	A0A0S2Z428	KRT6A	23.821	5.1352	0	16.297	0	8.8633	20.616
Heat shock 70 kDa protein 1B GN=HSPA1B	A0A0G2JIW1	HSPA1B	17.324	20.541	23.951	23.966	33.648	35.453	30.923
Heat shock cognate 71 kDa protein GN=HSPA8	P11142	HSPA8	12.993	13.694	17.108	14.379	18.452	22.158	19.757
Heat shock protein 90kDa alpha (Cytosolic), class B member 1, isoform CRA_a GN=HSP90AB1	A0A024RD80	HSP90AB1	7.5793	5.1352	6.843	5.7518	7.598	7.7554	8.5899
Hematopoietic lineage cell-specific protein GN=HCLS1	P14317	HCLS1	3.2483	1.7117	2.281	1.9173	0	4.4317	0
Hemoglobin alpha-2 chain variant (Fragment) GN=HBA2	E9LUX2	HBA2	0	0.85586	5.7025	1.9173	2.1708	1.1079	0
Hemopexin GN=HPX	P02790	HPX	1.0828	5.1352	6.843	1.9173	1.0854	0	4.2949
Heterogeneous nuclear ribonucleoprotein H3 (2H9), isoform CRA_a GN=HNRPH3	A0A024QZK8	HNRPH3	0	0	0	0	1.0854	1.1079	0.85899
Heterogeneous nuclear ribonucleoprotein K GN=HNRPK	A0A024R228	HNRPK	0	0	0	0.95863	0	1.1079	0.85899
Hexokinase GN=HK3	A0A024R7R1	HK3	24.903	13.694	14.827	23.966	19.538	21.05	23.193
High mobility group protein 1 GN=HMGB1	A0A024RDR0	HMGB1	2.1655	3.4234	13.686	4.7931	1.0854	5.5396	0
High mobility group protein B2 GN=HMGB2	P26583	HMGB2	10.828	11.982	15.967	14.379	5.4271	12.187	3.4359
Histone H2A GN=H2AFJ	A0A024RAS2	H2AFJ	1.0828	0	1.1405	0	0	0	0.85899
Histone H2B GN=HIST1H2BD	A0A024QZZ7	HIST1H2BD	22.738	11.126	12.546	9.5863	6.5125	7.7554	7.7309
Histone H2B GN=HIST1H2BJ	A0A024RCJ2	HIST1H2BJ	21.655	9.4145	9.124	8.6277	5.4271	6.6475	7.7309
Histone H3 GN=H3F3B	B2R4P9	H3F3B	7.5793	2.5676	6.843	5.7518	4.3417	3.3237	2.577
Histone H4 GN=HIST1H4J	B2R4R0	HIST1H4J	11.91	4.2793	13.686	6.7104	1.0854	1.1079	4.2949
Histone HIST2H3PS2 GN=H3-2	Q5TEC6	H3-2	2.1655	0	3.4215	0	0	0	0
Hornerin GN=HRNR	Q86YZ3	HRNR	9.7448	2.5676	0	69.98	1.0854	0	0
Hypoxanthine phosphoribosyltransferase	A0A140VJL3	N/A	2.1655	1.7117	1.1405	0.95863	3.2563	2.2158	1.718
IgG H chain	S6BGE0	N/A	4.331	14.55	21.67	11.504	15.196	9.9712	15.462
IgG L chain	S6AWD3	N/A	5.4138	14.55	25.091	11.504	9.7688	6.6475	12.885
IGH c427_heavy__IGHV3-74_IGHD7-27_IGHJ4 (Fragment)	A0A5C2G716	N/A	1.0828	3.4234	1.1405	0.95863	1.0854	0	0.85899
IGL c2631_light_IGKV3-20_IGKJ2 (Fragment)	A0A5C2G078	N/A	0	2.5676	1.1405	0.95863	1.0854	1.1079	1.718
IGL protein GN=IGL	Q8N355	IGL	3.2483	17.973	22.81	4.7931	6.5125	3.3237	6.8719
IGL protein GN=IGL	Q6NS95	IGL	2.1655	7.7027	11.405	2.8759	3.2563	2.2158	5.1539
Immunoglobulin heavy constant alpha 1 (Fragment) GN=IGHA1	A0A286YEY1	IGHA1	6.4966	26.532	22.81	7.669	7.598	4.4317	10.308
Immunoglobulin heavy constant alpha 2 (Fragment) GN=IGHA2	A0A0G2JMB2	IGHA2	4.331	15.405	13.686	5.7518	4.3417	1.1079	3.4359
Immunoglobulin heavy constant gamma 3 (Fragment) GN=IGHG3	A0A286YES1	IGHG3	7.5793	26.532	28.513	12.462	10.854	8.8633	18.039
Immunoglobulin heavy constant gamma 4 (Fragment) GN=IGHG4	A0A286YFJ8	IGHG4	5.4138	19.685	20.529	12.462	10.854	6.6475	18.039
Immunoglobulin heavy constant mu GN=IGHM	P01871	IGHM	1.0828	10.27	11.405	0.95863	1.0854	1.1079	2.577
Immunoglobulin kappa constant (Fragment) GN=IGKC	A0A5H1ZRQ3	IGKC	8.6621	23.108	29.653	10.545	10.854	4.4317	17.18
Integrin beta GN=ITGB2	A0A494C0X7	ITGB2	3.2483	10.27	6.843	3.8345	6.5125	2.2158	5.1539
Inter-alpha (Globulin) inhibitor H4 (Plasma Kallikrein-sensitive glycoprotein) GN=ITIH4	B2RMS9	ITIH4	0	3.4234	4.562	0	0	0	0
Isocitrate dehydrogenase [NADP] GN=IDH1	A0A024R3Y6	IDH1	0	1.7117	0	1.9173	1.0854	1.1079	2.577
K(+) channel subunit beta-2 GN=KCNAB2	A0A590UJB6	KCNAB2	1.0828	0.85586	1.1405	0	2.1708	0	0.85899
Keratin, type I cytoskeletal 10 GN=KRT10	P13645	KRT10	111.52	34.234	23.951	38.345	32.563	25.482	52.398
Keratin, type I cytoskeletal 14 GN=KRT14	P02533	KRT14	31.4	6.8469	0	10.545	3.2563	5.5396	20.616
Keratin, type I cytoskeletal 16 GN=KRT16	P08779	KRT16	19.49	5.991	5.7025	12.462	2.1708	5.5396	29.206
Keratin, type I cytoskeletal 17 GN=KRT17	Q04695	KRT17	10.828	2.5676	0	2.8759	0	3.3237	8.5899
Keratin, type I cytoskeletal 9 GN=KRT9	P35527	KRT9	148.34	41.081	18.248	194.6	21.708	29.914	42.949
Keratin, type II cytoskeletal 2 epidermal GN=KRT2	P35908	KRT2	137.51	26.532	10.265	38.345	27.136	27.698	23.193
Keratin, type II cytoskeletal 5 GN=KRT5	P13647	KRT5	35.731	3.4234	2.281	20.131	4.3417	4.4317	20.616
Keratin, type II cytoskeletal 6B GN=KRT6B	P04259	KRT6B	27.069	5.991	0	19.173	0	11.079	18.898
Lactotransferrin	W8QEY1	N/A	66.048	82.163	124.31	76.69	61.869	67.583	70.437
Lactotransferrin GN=LTF	A0A161I202	LTF	67.131	80.451	127.74	79.566	64.04	70.907	73.873
Lamin-B1 GN=LMNB1	P20700	LMNB1	2.1655	4.2793	2.281	1.9173	4.3417	5.5396	2.577
Leucine rich repeat (In FLII) interacting protein 1, isoform CRA_c GN=LRRFIP1	A0A0F7NGI8	LRRFIP1	2.1655	4.2793	3.4215	0.95863	0	4.4317	1.718
Leukotriene A(4) hydrolase	A0A140VK27	N/A	28.152	22.252	19.389	25.883	26.05	26.59	25.77
L-lactate dehydrogenase A chain GN=LDHA	P00338	LDHA	16.241	17.117	14.827	14.379	27.136	21.05	22.334
L-lactate dehydrogenase B chain GN=LDHB	P07195	LDHB	2.1655	3.4234	7.9835	4.7931	7.598	6.6475	10.308
Lymphocyte-specific protein 1 (Fragment) GN=LSP1	E9PBD8	LSP1	4.331	0.85586	4.562	3.8345	2.1708	3.3237	1.718
Macrophage-capping protein	B2R9S4	N/A	5.4138	5.1352	4.562	5.7518	6.5125	6.6475	6.8719
Malate dehydrogenase GN=MDH2	A0A024R4K3	MDH2	0	0.85586	2.281	0	0	0	1.718
Malate dehydrogenase, cytoplasmic GN=MDH1	P40925	MDH1	0	0.85586	0	0.95863	1.0854	1.1079	0.85899
Metavinculin GN=VCL	A0A024QZN4	VCL	7.5793	15.405	9.124	15.338	24.965	21.05	15.462
Mitofusin-2 GN=MFN2	A0A6Q8PGR2	MFN2	2.1655	0.85586	1.1405	0.95863	1.0854	1.1079	0
Mitogen-activated protein kinase 14 GN=MAPK14	A0A024RD15	MAPK14	0	0.85586	1.1405	0.95863	1.0854	1.1079	1.718
Moesin GN=MSN	P26038	MSN	22.738	23.964	29.653	26.842	17.367	32.13	19.757
Mutant hemoglobin alpha 2 globin chain GN=HBA2	A0A0K2BMD8	HBA2	8.6621	11.126	13.686	8.6277	17.367	9.9712	3.4359
Myeloid cell nuclear differentiation antigen GN=MNDA	P41218	MNDA	11.91	10.27	17.108	10.545	6.5125	5.5396	12.885
Myeloperoxidase GN=MPO	P05164	MPO	41.145	49.64	69.571	34.511	37.99	38.777	29.206
MYO1F variant protein	B0I1T1	N/A	2.1655	3.4234	1.1405	0	0	0	2.577
Myosin light polypeptide 6 GN=MYL6	G8JLA2	MYL6	3.2483	5.991	5.7025	9.5863	13.025	12.187	9.4488
Myosin light polypeptide 6 GN=MYL6	B7Z6Z4	MYL6	3.2483	5.1352	5.7025	8.6277	13.025	11.079	8.5899
Myosin regulatory light chain 12A GN=MYL12A	J3QRS3	MYL12A	2.1655	2.5676	1.1405	1.9173	4.3417	2.2158	5.1539
Myosin, heavy polypeptide 9, non-muscle, isoform CRA_a GN=MYH9	A0A024R1N1	MYH9	113.69	127.52	131.16	122.7	138.93	165.08	127.13
NAD(+) kinase GN=NADK	A0A024R058	NADK	0	0	0	0.95863	0	1.1079	0.85899
NAD(P)H dehydrogenase, quinone 2, isoform CRA_a GN=NQO2	A0A024QZT9	NQO2	0	2.5676	1.1405	0.95863	1.0854	0	5.1539
Neutrophil cytosol factor 1 GN=NCF1	P14598	NCF1	3.2483	5.1352	9.124	11.504	5.4271	12.187	6.8719
Neutrophil cytosol factor 4 GN=NCF4	A0A494BZS1	NCF4	3.2483	7.7027	3.4215	5.7518	4.3417	3.3237	2.577
Neutrophil cytosolic factor 2 (65kDa, chronic granulomatous disease, autosomal 2), isoform CRA_a GN=NCF2	A0A024R936	NCF2	2.1655	1.7117	2.281	0.95863	2.1708	0	1.718
Neutrophil defensin 1 GN=DEFA1	P59665	DEFA1	2.1655	2.5676	5.7025	3.8345	1.0854	2.2158	1.718
Neutrophil elastase GN=ELANE	P08246	ELANE	11.91	15.405	27.372	4.7931	7.598	5.5396	12.026
Neutrophil gelatinase-associated lipocalin GN=NGAL	B2ZDQ1	NGAL	3.2483	2.5676	10.265	4.7931	6.5125	2.2158	4.2949
Nicotinamide phosphoribosyltransferase GN=PBEF1	A0A024R718	PBEF1	1.0828	1.7117	6.843	2.8759	1.0854	1.1079	3.4359
Nicotinate phosphoribosyltransferase GN=NAPRT	G5E977	NAPRT	2.1655	0.85586	1.1405	2.8759	2.1708	3.3237	0.85899
Parkinson disease protein 7 GN=PARK7	K7ELW0	PARK7	0	0.85586	1.1405	0.95863	1.0854	0	0.85899
PDE4DIP protein GN=PDE4DIP	Q6P470	PDE4DIP	0	1.7117	1.1405	1.9173	2.1708	2.2158	0
Peptidyl-prolyl cis-trans isomerase	A8K486	N/A	24.903	23.108	28.513	24.924	39.075	35.453	28.347
Peptidylprolyl isomerase GN=FKBP1A	A0A087WZM5	FKBP1A	0	0	0	0	1.0854	1.1079	1.718
Peroxiredoxin-1 GN=PRDX1	A0A0A0MRQ5	PRDX1	0	1.7117	2.281	1.9173	1.0854	0	1.718
Peroxiredoxin-5 GN=HEL-S-55	V9HW35	HEL-S-55	1.0828	1.7117	1.1405	2.8759	2.1708	4.4317	4.2949
Peroxiredoxin-6 GN=PRDX6	P30041	PRDX6	0	0	0	0.95863	2.1708	2.2158	0.85899
Phosphatidylinositol 3-kinase 85 kDa regulatory subunit alpha (Fragment) GN=PIK3R1	A0A2X0SFG1	PIK3R1	0	0.85586	1.1405	0.95863	0	0	1.718
Phosphoglucomutase-1 GN=PGM1	A0A3B3ITK7	PGM1	2.1655	1.7117	2.281	2.8759	3.2563	1.1079	6.0129
Phosphoglucomutase-2 GN=PGM2	Q96G03	PGM2	0	0.85586	1.1405	0	0	0	0
Phosphoglycerate kinase 1 GN=PGK1	P00558	PGK1	16.241	17.973	6.843	18.214	30.392	28.806	14.603
Phosphoglycerate mutase 1 GN=PGAM1	P18669	PGAM1	10.828	8.5586	11.405	5.7518	8.6834	11.079	7.7309
Platelet-activating factor acetylhydrolase IB subunit alpha GN=PAFAH1B1	A0A6Q8PFU3	PAFAH1B1	1.0828	0.85586	0	0.95863	0	1.1079	0.85899
Pleckstrin GN=PLEK	P08567	PLEK	2.1655	0.85586	2.281	0.95863	1.0854	1.1079	0.85899
Poly(rC)-binding protein 1 GN=PCBP1	Q15365	PCBP1	3.2483	2.5676	0	2.8759	3.2563	3.3237	1.718
Polyunsaturated fatty acid 5-lipoxygenase GN=ALOX5	P09917	ALOX5	1.0828	1.7117	1.1405	0	1.0854	0	0.85899
Potassium channel tetramerisation domain containing 12 GN=KCTD12	A0A140VJM4	KCTD12	1.0828	0.85586	0	0.95863	0	0	0
POTE ankyrin domain family member E GN=POTEE	Q6S8J3	POTEE	34.648	31.667	26.232	47.931	55.357	60.935	52.398
Profilin-1 GN=PFN1	P07737	PFN1	22.738	19.685	28.513	42.18	40.161	36.561	27.488
Proteasome subunit alpha type	A0A140VK43	N/A	0	0.85586	2.281	0.95863	1.0854	1.1079	1.718
Proteasome subunit alpha type	A0A140VK44	N/A	0	0.85586	0	1.9173	2.1708	1.1079	2.577
Proteasome subunit alpha type	A0A109NGN6	N/A	0	0	0	0	2.1708	1.1079	2.577
Proteasome subunit alpha type-1 GN=PSMA1	F5GX11	PSMA1	0	0	0	0	2.1708	1.1079	1.718
Proteasome subunit beta	A0A140VK46	N/A	0	0.85586	1.1405	0	0	0	0
Proteasome subunit beta (Fragment) GN=PSMA4 SV=8	H0YKT8	PSMA4	0	0.85586	0	0.95863	1.0854	0	0.85899
Proteasome subunit beta type-8 GN=PSMB8	P28062	PSMB8	0	0.85586	1.1405	0.95863	1.0854	1.1079	0.85899
Protein AMBP GN=AMBP	P02760	AMBP	1.0828	3.4234	5.7025	2.8759	3.2563	3.3237	1.718
Protein S100-A11 GN=S100A11	P31949	S100A11	23.821	11.126	15.967	18.214	17.367	15.511	12.885
Protein S100-A12 GN=S100A12	P80511	S100A12	31.4	23.964	27.372	29.718	34.734	38.777	30.923
Protein S100-A4 GN=S100A4	P26447	S100A4	8.6621	5.1352	5.7025	8.6277	6.5125	5.5396	4.2949
Protein S100-A6 GN=S100A6	P06703	S100A6	21.655	9.4145	12.546	9.5863	13.025	11.079	12.026
Protein S100-A8 GN=S100A8	P05109	S100A8	187.32	150.63	147.12	164.88	171.5	171.73	169.22
Protein S100-A9 GN=S100A9	P06702	S100A9	154.83	114.69	124.31	130.37	149.79	144.03	120.26
Protein S100-P GN=S100P	P25815	S100P	15.159	11.126	10.265	9.5863	13.025	11.079	6.8719
Protein XRP2 GN=RP2	A0A1B2JLU2	RP2	1.0828	0.85586	0	0	1.0854	0	0
Protein-arginine deiminase type-2 GN=PADI2	Q9Y2J8	PADI2	2.1655	4.2793	1.1405	1.9173	2.1708	0	0.85899
Protein-arginine deiminase type-4 GN=PADI4	Q9UM07	PADI4	7.5793	4.2793	1.1405	8.6277	0	6.6475	0.85899
Proteinase 3 (Serine proteinase, neutrophil, Wegener granulomatosis autoantigen), isoform CRA_a GN=PRTN3	D6CHE9	PRTN3	4.331	5.991	7.9835	2.8759	5.4271	4.4317	7.7309
Prothrombin (Fragment) GN=F2	C9JV37	F2	0	0.85586	2.281	0	0	0	0
Prothymosin alpha GN=PTMA	B8ZZA1	PTMA	3.2483	3.4234	5.7025	1.9173	1.0854	2.2158	0.85899
Purine nucleoside phosphorylase GN=PNP	P00491	PNP	7.5793	7.7027	4.562	9.5863	8.6834	8.8633	6.8719
Putative nucleoside diphosphate kinase GN=NME2P1	O60361	NME2P1	1.0828	0.85586	0	2.8759	3.2563	4.4317	1.718
Pyridoxal kinase GN=PDXK	O00764	PDXK	6.4966	4.2793	2.281	0.95863	1.0854	2.2158	3.4359
Pyruvate kinase PKM GN=PKM	P14618	PKM	30.317	29.099	25.091	36.428	58.613	56.504	40.372
Rab GDP dissociation inhibitor	B4DLV7	N/A	10.828	12.838	7.9835	14.379	11.94	9.9712	14.603
Rab GDP dissociation inhibitor (Fragment) GN=GDI1	A0A0S2Z3X8	GDI1	5.4138	4.2793	4.562	0	0	4.4317	5.1539
RAB11A, member RAS oncogene family, isoform CRA_a GN=RAB11A	A0A024R5Z8	RAB11A	2.1655	0.85586	0	2.8759	3.2563	3.3237	0.85899
RAB7, member RAS oncogene family, isoform CRA_a GN=RAB7A	A0A158RFU6	RAB7A	1.0828	1.7117	1.1405	1.9173	2.1708	2.2158	2.577
Ras-related C3 botulinum toxin substrate 2 (Rho family, small GTP binding protein Rac2), isoform CRA_a GN=RAC2	A0A024R1P2	RAC2	2.1655	2.5676	1.1405	1.9173	1.0854	2.2158	0.85899
Ras-related protein Rab-10 GN=RAB10	P61026	RAB10	1.0828	3.4234	1.1405	1.9173	4.3417	2.2158	3.4359
Receptor-type tyrosine-protein phosphatase C GN=PTPRC	P08575	PTPRC	1.0828	0.85586	0	0	1.0854	1.1079	0.85899
Rho GDP dissociation inhibitor (GDI) beta, isoform CRA_a GN=ARHGDIB	A0A024RAS5	ARHGDIB	4.331	7.7027	6.843	17.255	15.196	25.482	10.308
Rho GDP-dissociation inhibitor 1 GN=ARHGDIA	P52565	ARHGDIA	2.1655	2.5676	2.281	0.95863	3.2563	2.2158	3.4359
Ribonuclease inhibitor GN=RNH1	A0A024RC87	RNH1	7.5793	5.991	4.562	5.7518	3.2563	6.6475	7.7309
Ribose-5-phosphate isomerase GN=RPIA	P49247	RPIA	0	0.85586	1.1405	0	0	0	0.85899
RNA-binding protein 8A GN=RBM8	A0A023T787	RBM8	1.0828	0.85586	1.1405	0.95863	0	1.1079	0
SEC22 vesicle trafficking protein B (Fragment) GN=SEC22B	I1VE16	SEC22B	1.0828	0	1.1405	0	0	1.1079	0
Serine/arginine-rich-splicing factor 3 GN=SRSF3	A0A087X2D0	SRSF3	0	0	0	0.95863	1.0854	1.1079	0
Serine/threonine-protein phosphatase GN=PPP1CC	A0A024RBP2	PPP1CC	1.0828	0.85586	0	0.95863	0	1.1079	0.85899
Serine/threonine-protein phosphatase CPPED1 GN=CPPED1	Q9BRF8	CPPED1	0	3.4234	1.1405	0	3.2563	1.1079	1.718
Serpin peptidase inhibitor clade G member 1 GN=SERPING1	A0A348GSH7	SERPING1	0	0.85586	1.1405	0	0	0	0
Serpin peptidase inhibitor, clade A (Alpha-1 antiproteinase, antitrypsin), member 3, isoform CRA_c GN=SERPINA3	A0A024R6P0	SERPINA3	1.0828	5.991	12.546	0.95863	4.3417	2.2158	7.7309
Serpin peptidase inhibitor, clade B (Ovalbumin), member 6, isoform CRA_a GN=SERPINB6	A0A024QZX3	SERPINB6	3.2483	2.5676	2.281	1.9173	3.2563	2.2158	3.4359
Serum amyloid P-component GN=APCS	P02743	APCS	3.2483	5.1352	6.843	2.8759	3.2563	3.3237	4.2949
SET translocation (Myeloid leukemia-associated), isoform CRA_b GN=SET	A0A024R895	SET	1.0828	0	2.281	0.95863	1.0854	1.1079	0.85899
SH3 domain binding glutamic acid-rich protein like 3, isoform CRA_a (Fragment) GN=SH3BGRL3	D3DPK5	SH3BGRL3	2.1655	3.4234	4.562	1.9173	5.4271	3.3237	2.577
SH3 domain-binding glutamic acid-rich-like protein GN=SH3BGRL	O75368	SH3BGRL	1.0828	4.2793	9.124	2.8759	6.5125	4.4317	4.2949
Signal recognition particle 9kDa, isoform CRA_b GN=SRP9	A0A024R3P3	SRP9	1.0828	0.85586	0	0.95863	1.0854	1.1079	0
Signal transducer and activator of transcription	B4DNP0	N/A	0	0	0	0	1.0854	1.1079	0.85899
Small cytidine deaminase	Q6GV32	N/A	1.0828	0.85586	0	0	1.0854	1.1079	0
Small nuclear ribonucleoprotein F GN=SNRPF	P62306	SNRPF	1.0828	0	2.281	0	0	0	0
Small nuclear ribonucleoprotein-associated protein GN=SNRPB	B4DVS0	SNRPB	0	0.85586	1.1405	0.95863	0	0	0
Spectrin beta chain GN=SPTBN1	A0A087WUZ3	SPTBN1	1.0828	2.5676	3.4215	1.9173	5.4271	2.2158	2.577
Spectrin, alpha, non-erythrocytic 1 (Alpha-fodrin), isoform CRA_g GN=SPTAN1	A0A024R889	SPTAN1	4.331	7.7027	2.281	2.8759	4.3417	6.6475	7.7309
Stathmin	A0A140VJW2	N/A	1.0828	1.7117	2.281	0	0	1.1079	0
Stomatin, isoform CRA_a GN=STOM	A0A024R882	STOM	0	1.7117	3.4215	0	1.0854	0	0.85899
Superoxide dismutase [Cu-Zn] GN=SOD1	P00441	SOD1	2.1655	1.7117	6.843	3.8345	2.1708	5.5396	2.577
Talin-1 GN=TLN1	A0A1S5UZ07	TLN1	4.331	5.991	3.4215	4.7931	9.7688	11.079	8.5899
T-complex protein 1 subunit eta GN=CCT7	B7Z1C9	CCT7	1.0828	0.85586	0	0.95863	1.0854	0	0.85899
Thioredoxin GN=TXN	H9ZYJ2	TXN	9.7448	10.27	13.686	8.6277	8.6834	13.295	6.0129
Thioredoxin-disulfide reductase GN=TXNRD1	A0A024RBK9	TXNRD1	2.1655	1.7117	0	0	0	0	0
Transaldolase	A0A140VK56	N/A	25.986	16.261	21.67	12.462	14.111	16.619	12.026
Transketolase GN=TKT	P29401	TKT	119.1	139.51	140.28	99.697	117.23	107.47	91.911
Transportin 3, isoform CRA_b GN=TNPO3	A0A024R794	TNPO3	1.0828	0.85586	0	0	0	0	0.85899
Transthyretin GN=TTR	A0A087WT59	TTR	3.2483	11.126	9.124	1.9173	2.1708	3.3237	4.2949
Triosephosphate isomerase GN=TPI1	P60174	TPI1	45.476	47.072	39.918	30.676	39.075	40.993	36.936
Tripeptidyl-peptidase 2 (Fragment) GN=TPP2	A0A494C0U1	TPP2	0	0.85586	1.1405	0.95863	1.0854	1.1079	0.85899
Tropomyosin 3 isoform 1 (Fragment) GN=TPM3	A0A0S2Z4G4	TPM3	0	0.85586	4.562	1.9173	2.1708	3.3237	0.85899
Tr-type G domain-containing protein	A0A4D5RAC7	N/A	4.331	1.7117	3.4215	1.9173	0	3.3237	4.2949
Tubulin alpha-1A chain GN=TUBA1A	Q71U36	TUBA1A	4.331	4.2793	1.1405	3.8345	2.1708	6.6475	5.1539
Tubulin alpha-4A chain GN=TUBA4A	P68366	TUBA4A	7.5793	6.8469	3.4215	6.7104	5.4271	7.7554	6.0129
Tubulin beta chain GN=TUBB	P07437	TUBB	2.1655	2.5676	2.281	5.7518	2.1708	4.4317	6.8719
Tubulin beta-4B chain GN=TUBB4B	P68371	TUBB4B	2.1655	2.5676	2.281	3.8345	2.1708	3.3237	6.0129
Tubulin-specific chaperone A GN=TBCA	E5RIW3	TBCA	0	0.85586	1.1405	0.95863	0	1.1079	0
Twinfilin-2 GN=TWF2	Q6IBS0	TWF2	1.0828	1.7117	1.1405	0	1.0854	1.1079	1.718
Tyrosine 3-monooxygenase/tryptophan 5-monooxygenase activation protein, eta polypeptide, isoform CRA_b GN=YWHAH	A0A024R1K7	YWHAH	4.331	4.2793	6.843	2.8759	5.4271	2.2158	6.0129
Tyrosine-protein kinase	A8K3B6	N/A	1.0828	2.5676	0	0.95863	0	0	0.85899
Tyrosine-protein kinase (Fragment) GN=LYN	Q6NUK7	LYN	0	0	0	0.95863	1.0854	1.1079	0.85899
Tyrosine-protein kinase Fgr GN=FGR	P09769	FGR	1.0828	0.85586	0	1.9173	2.1708	2.2158	1.718
Tyrosine-protein phosphatase non-receptor type 6 GN=PTPN6	P29350	PTPN6	17.324	11.982	10.265	16.297	10.854	12.187	12.026
Ubiquitin-activating enzyme E1 GN=UBE1	A0A024R1A3	UBE1	2.1655	3.4234	3.4215	3.8345	6.5125	4.4317	4.2949
Ubiquitin-conjugating enzyme E2 N GN=UBE2N	P61088	UBE2N	0	0	0	0.95863	1.0854	1.1079	0.85899
Ubiquitin-conjugating enzyme E2D 3 (UBC4/5 homolog, yeast), isoform CRA_a GN=UBE2D3	A0A024RDH2	UBE2D3	1.0828	0.85586	0	0.95863	0	1.1079	0.85899
Uncharacterized protein	A8K008	N/A	11.91	36.802	46.761	23.966	23.879	14.403	30.065
Uncharacterized protein	Q6GMV8	N/A	2.1655	15.405	20.529	3.8345	4.3417	0	6.0129
Uncharacterized protein (Fragment)	Q96DE1	N/A	56.304	54.775	43.339	72.856	98.774	107.47	85.899
Uncharacterized protein DKFZp686C15213 GN=DKFZp686C15213	Q6MZU6	DKFZp686C15213	5.4138	25.676	37.637	12.462	14.111	7.7554	18.898
Uncharacterized protein DKFZp686K18196 (Fragment) GN=DKFZp686K18196	Q6N092	DKFZp686K18196	6.4966	22.252	20.529	7.669	7.598	4.4317	8.5899
UTP--glucose-1-phosphate uridylyltransferase GN=UGP2	A0A087WYS1	UGP2	0	0.85586	2.281	3.8345	7.598	3.3237	4.2949
Vacuolar protein sorting-associated protein 35 GN=VPS35	Q96QK1	VPS35	0	1.7117	1.1405	2.8759	0	0	2.577
Vasodilator-stimulated phosphoprotein isoform 1 GN=VASP	A0A024R0V4	VASP	1.0828	3.4234	3.4215	1.9173	2.1708	1.1079	0.85899
Vesicle amine transport protein 1 homolog (T californica), isoform CRA_a GN=VAT1	A0A024R1Z6	VAT1	1.0828	1.7117	1.1405	1.9173	3.2563	3.3237	0.85899
Vimentin GN=VIM	P08670	VIM	41.145	34.234	18.248	43.138	54.271	69.799	23.193
WD repeat domain 1, isoform CRA_a (Fragment) GN=WDR1	Q53GN4	WDR1	7.5793	10.27	9.124	12.462	8.6834	14.403	15.462
YWHAE/FAM22A fusion protein (Fragment) GN=YWHAE/FAM22A fusion	G9K388	YWHAE	3.2483	3.4234	3.4215	0.95863	2.1708	0	7.7309
Zyxin (Fragment) GN=ZYX	H0Y2Y8	ZYX	0	1.7117	1.1405	1.9173	2.1708	1.1079	0

## Sheet: Table S2
			Normalized Total Spectral Counts
			Healthy controls			T1D
Protein description	Accession Number	Gene name	HC1	HC2	HC3	T1D1	T1D2	T1D3	T1D4
1,4-beta-N-acetylmuramidase C GN=LYZ	B2R4C5	LYZ	14.438	16.132	20.379	14.07	8.7798	19.623	6.3222
14-3-3 protein beta/alpha GN=YWHAB	B5BU24	YWHAB	5.1565	0	2.9113	0	3.7628	5.2327	3.1611
2-phospho-D-glycerate hydro-lyase GN=EDARADD	L0R849	EDARADD	1.0313	0.84907	0	2.01	0	0	0
2-phospho-D-glycerate hydro-lyase GN=HEL-S-17	A0A024R4F1	HEL-S-17	30.939	9.3397	23.29	28.14	27.594	36.629	24.498
40S ribosomal protein S27a (Fragment)	A0A248RGE3	N/A	1.0313	0.84907	1.9409	2.01	2.5085	2.6164	0.79027
4-alpha-glucanotransferase GN=AGL	A0A0M4G3H8	AGL	0	3.3963	1.9409	0	0	0	2.3708
6-phosphogluconate dehydrogenase, decarboxylating GN=PGD	P52209	PGD	23.72	6.7925	12.616	24.12	23.831	17.006	18.176
92 kDa gelatinase	B7Z507	N/A	11.344	10.189	17.468	9.0451	13.797	5.2327	6.3222
MHC class I antigen	A0A288QCG4	HLA-C	1.0313	1.6981	0.97043	0	0	0	1.5805
Actin, cytoplasmic 1 (Fragment) GN=ACTB	A0A2R8YFE2	ACTB	20.626	16.981	24.261	12.06	26.339	40.553	22.918
Actin, cytoplasmic 1 (Fragment) GN=ACTB	A0A2R8Y793	ACTB	149.54	114.62	140.71	127.64	170.58	209.31	173.86
Actin, cytoplasmic 1 (Fragment) GN=ACTB	A0A2R8YGF8	ACTB	64.972	51.793	66.96	58.29	84.035	91.572	85.349
Actin, cytoplasmic 1 (Fragment) GN=ACTB	A0A2R8YEA7	ACTB	58.784	49.246	53.374	49.245	65.222	88.956	60.851
Actin, cytoplasmic 2 (Fragment) GN=ACTG1	I3L4N8	ACTG1	69.097	50.944	74.723	61.305	80.273	100.73	71.915
Actin-depolymerizing factor	B7Z992	N/A	17.532	22.925	22.32	14.07	30.102	41.862	27.659
Actin-depolymerizing factor	A0A384MEF1	N/A	17.532	22.925	22.32	13.065	30.102	40.553	27.659
Actin-depolymerizing factor	B3KS49	N/A	7.2191	11.887	9.7043	8.0401	17.56	24.855	11.064
Actinin alpha 4 isoform 1 (Fragment) GN=ACTN4	A0A0S2Z3G9	ACTN4	34.033	22.076	31.054	22.11	27.594	27.472	23.708
Actinin, alpha 1, isoform CRA_a GN=ACTN1	A0A024R694	ACTN1	47.44	34.812	48.521	34.17	50.17	49.711	41.094
Actin-like protein 3 GN=ACTR3	A0A024RAI1	ACTR3	11.344	10.189	14.556	14.07	8.7798	10.465	16.596
Actin-related protein 2 GN=ACTR2	P61160	ACTR2	13.407	6.7925	10.675	7.0351	12.543	10.465	10.274
Actin-related protein 2/3 complex subunit 2 GN=ARPC2	O15144	ARPC2	4.1252	5.9435	6.793	2.01	6.2713	7.8491	2.3708
Actin-related protein 2/3 complex subunit 3	B4DM63	N/A	2.0626	0.84907	0.97043	1.005	0	0	1.5805
Actin-related protein 2/3 complex subunit 4 GN=ARPC4	P59998	ARPC4	4.1252	2.5472	2.9113	7.0351	6.2713	7.8491	3.1611
Actin-related protein 2/3 complex subunit 5 GN=ARPC5	O15511	ARPC5	5.1565	1.6981	3.8817	3.015	2.5085	7.8491	2.3708
Actin-related protein 2/3 complex subunit GN=ARPC1B	A4D275	ARPC1B	11.344	9.3397	8.7339	10.05	11.288	13.082	7.9027
Adenylate kinase 2, mitochondrial GN=AK2	A0A140VK93	AK2	2.0626	0	0.97043	0	0	0	0
Adenylosuccinate synthetase isozyme 2 GN=ADSS	A0A024R5Q7	ADSS	2.0626	0.84907	1.9409	2.01	3.7628	3.9245	2.3708
Adenylyl cyclase-associated protein 1	B4DI38	N/A	10.313	3.3963	4.8521	7.0351	7.5256	6.5409	7.9027
Adiponectin A GN=ADIA	A0A024RAB9	ADIA	2.0626	1.6981	0.97043	1.005	0	0	0.79027
Adiponectin B GN=ADIB	A0A024RAA7	ADIB	1.0313	1.6981	2.9113	1.005	2.5085	1.3082	2.3708
Albumin GN=ALB	P02768	ALB	277.42	441.51	300.83	166.83	252.11	218.47	256.05
Aldehyde dehydrogenase family 16 member A1 GN=ALDH16A1	Q8IZ83	ALDH16A1	0	0.84907	1.9409	1.005	0	0	0.79027
Alpha-1-acid glycoprotein 1 GN=ORM1	P02763	ORM1	3.0939	5.0944	4.8521	3.015	1.2543	0	0.79027
Alpha-1-acid glycoprotein 2 GN=ORM2	P19652	ORM2	2.0626	1.6981	0	0	0	0	0
Alpha-1-antichymotrypsin (Fragment) GN=SERPINA3	G3V595	SERPINA3	6.1878	10.189	5.8226	4.02	8.7798	0	5.5319
Alpha-1B-glycoprotein GN=A1BG	P04217	A1BG	0	2.5472	2.9113	0	2.5085	1.3082	2.3708
Alpha-2-HS-glycoprotein	B7Z8Q2	N/A	3.0939	4.2453	2.9113	1.005	2.5085	1.3082	3.1611
Alpha-2-macroglobulin GN=A2M	P01023	A2M	14.438	56.887	26.202	9.0451	15.051	3.9245	20.547
Aminopeptidase	B7Z4B2	N/A	1.0313	0	0	1.005	1.2543	0	2.3708
Annexin (Fragment) GN=ANXA6	E5RJF5	ANXA6	5.1565	11.038	9.7043	5.025	10.034	18.314	11.854
Annexin (Fragment) GN=ANXA6	A0A0S2Z2Z6	ANXA6	24.751	47.548	46.581	19.095	45.153	75.874	55.319
Annexin (Fragment) GN=ANXA6	A0A0S2Z377	ANXA6	23.72	47.548	45.61	19.095	46.408	74.566	55.319
Annexin (Fragment)	Q59EP1	N/A	5.1565	8.4907	8.7339	10.05	10.034	11.774	14.225
Annexin A1 GN=ANXA1	P04083	ANXA1	45.377	74.718	93.161	73.366	86.544	100.73	56.899
Annexin A11 GN=ANXA11	P50995	ANXA11	5.1565	9.3397	9.7043	11.055	12.543	13.082	14.225
Annexin A3 GN=ANXA3	P12429	ANXA3	18.563	18.679	37.847	22.11	15.051	31.396	18.176
Annexin A4 GN=ANXA4	P09525	ANXA4	18.563	21.227	25.231	20.1	27.594	34.013	26.079
Annexin A5 GN=ANXA5	P08758	ANXA5	8.2504	12.736	19.409	5.025	10.034	13.082	11.854
Annexin	B4DHY4	N/A	1.0313	0	2.9113	2.01	1.2543	3.9245	0.79027
Annexin	A0A4D5RAU4	N/A	35.064	43.302	57.255	46.23	51.425	60.176	33.982
Antibacterial peptide FALL-39	A0A384NPR0	N/A	10.313	13.585	11.645	13.065	10.034	11.774	9.4832
Apolipoprotein A-I, isoform CRA_a GN=APOA1	A0A024R3E3	APOA1	4.1252	4.2453	1.9409	5.025	1.2543	1.3082	4.7416
Apolipoprotein B (Including Ag(X) antigen) GN=APOB	C0JYY2	APOB	2.0626	7.6416	0.97043	7.0351	0	0	5.5319
Apolipoprotein H GN=APOH	A0A384NKM6	APOH	1.0313	11.887	4.8521	3.015	5.017	1.3082	4.7416
Arf-GAP with coiled-coil, ANK repeat and PH domain-containing protein 1 (Fragment) GN=ACAP1	I3L0K9	ACAP1	1.0313	0	0.97043	0	0	0	0.79027
ATP-dependent 6-phosphofructokinase, liver type GN=PFKL	P17858	PFKL	1.0313	0.84907	0	1.005	0	0	0.79027
Azurocidin GN=AZU1	P20160	AZU1	13.407	9.3397	8.7339	8.0401	6.2713	5.2327	5.5319
Bactericidal permeability-increasing protein GN=BPI	A0A2R8YDF1	BPI	13.407	6.7925	14.556	11.055	11.288	10.465	7.9027
Bactericidal permeability-increasing protein GN=BPI'	A2NX48	BPI	6.1878	3.3963	13.586	7.0351	7.5256	10.465	6.3222
Beta actin (Fragment)	K4ENJ5	N/A	18.563	17.83	22.32	23.115	22.577	36.629	18.966
Beta actin variant (Fragment)	Q53G99	N/A	166.04	127.36	160.12	135.68	189.39	238.09	193.62
Beta-1 metal-binding globulin (Fragment)	Q53H26	N/A	33.002	75.567	49.492	13.065	32.611	24.855	39.514
Beta-1 metal-binding globulin	B4E1B2	N/A	29.908	72.171	46.581	12.06	32.611	23.547	36.352
Beta-actin-like protein 2 GN=ACTBL2	Q562R1	ACTBL2	34.033	32.265	34.935	27.135	38.882	57.56	45.045
Beta-globin (Fragment) GN=HBB	Q9GZL9	HBB	18.563	16.132	24.261	16.08	22.577	15.698	5.5319
Beta-globin (Fragment) GN=HBB	A0A2S1CVU8	HBB	7.2191	6.7925	11.645	8.0401	11.288	7.8491	2.3708
Beta-globin GN=HBB	D9YZU5	HBB	18.563	16.132	27.172	17.085	22.577	15.698	5.5319
Brain acid soluble protein 1 GN=BASP1	P80723	BASP1	8.2504	6.7925	14.556	9.0451	5.017	5.2327	3.1611
C4b-binding protein alpha chain GN=C4BPA	P04003	C4BPA	1.0313	3.3963	0	0	0	0	0
Calreticulin GN=CALR	P27797	CALR	5.1565	3.3963	4.8521	6.03	5.017	2.6164	7.9027
Catalase	A0A384P5Q0	N/A	15.469	9.3397	6.793	21.105	8.7798	24.855	11.064
Cathepsin G GN=CTSG	P08311	CTSG	13.407	12.736	10.675	15.075	12.543	15.698	7.1124
cDNA FLJ25298 fis, clone STM07683, highly similar to Protein Tro alpha1 H,myeloma	Q96DK0	N/A	19.595	30.566	10.675	16.08	13.797	9.1572	15.805
cDNA FLJ52761, highly similar to Actin, aortic smooth muscle	B4DUI8	N/A	53.627	54.34	67.93	57.285	74.001	96.805	60.061
cDNA FLJ53075, highly similar to Kininogen-1	B4DPP8	N/A	0	1.6981	0.97043	5.025	1.2543	2.6164	1.5805
cDNA FLJ53963, highly similar to Leukocyte elastase inhibitor	B4E3A8	N/A	47.44	23.774	32.024	32.16	33.865	40.553	24.498
cDNA FLJ54839, highly similar to Lactotransferrin	B4E1V0	N/A	58.784	45.85	55.314	53.265	56.442	57.56	49.787
cDNA FLJ56821, highly similar to Inter-alpha-trypsin inhibitor heavy chain H1	B7Z549	N/A	3.0939	14.434	8.7339	10.05	7.5256	13.082	10.274
cDNA FLJ56954, highly similar to Inter-alpha-trypsin inhibitor heavy chain H1	B7Z539	N/A	3.0939	12.736	8.7339	9.0451	6.2713	11.774	9.4832
cDNA FLJ59379, highly similar to Hematopoietic lineage cell-specific protein	B4DQ92	N/A	0	0	0.97043	1.005	0	1.3082	0.79027
cDNA FLJ59433, highly similar to Elongation factor 1-gamma	B4DUP0	N/A	1.0313	1.6981	0.97043	1.005	0	1.3082	0.79027
cDNA FLJ60461, highly similar to Peroxiredoxin-2	B4DF70	N/A	1.0313	0.84907	2.9113	1.005	2.5085	2.6164	1.5805
cDNA FLJ75154, highly similar to Homo sapiens heterogeneous nuclear ribonucleoprotein C (C1/C2), mRNA	A8K9A4	N/A	1.0313	0	0.97043	1.005	0	1.3082	0.79027
cDNA FLJ75699, highly similar to Homo sapiens osteoclast stimulating factor 1 (OSTF1), mRNA	A8K646	N/A	2.0626	0.84907	0	3.015	0	0	2.3708
cDNA FLJ76079, highly similar to Homo sapiens lymphocyte-specific protein 1 (LSP1), mRNA	A8K2L4	N/A	1.0313	0.84907	1.9409	2.01	1.2543	1.3082	0.79027
cDNA FLJ76459, highly similar to Homo sapiens matrix metallopeptidase 8 (neutrophil collagenase) (MMP8), mRNA	A8K9E4	N/A	2.0626	1.6981	1.9409	1.005	0	1.3082	0.79027
cDNA FLJ77640, highly similar to Homo sapiens copine II (CPNE2), mRNA	A8K8A4	N/A	1.0313	0.84907	0	0	0	0	0.79027
cDNA, FLJ92583, highly similar to Homo sapiens glycogenin (GYG), mRNA	B2R5R5	N/A	5.1565	7.6416	10.675	6.03	7.5256	9.1572	7.1124
cDNA, FLJ93914, highly similar to Homo sapiens histidine-rich glycoprotein (HRG), mRNA	B2R8I2	N/A	1.0313	1.6981	0.97043	4.02	0	0	2.3708
cDNA, FLJ95208, highly similar to Homo sapiens PYD and CARD domain containing (PYCARD), transcript variant 1, mRNA	B2RAZ4	N/A	3.0939	0.84907	0	3.015	0	0	0.79027
cDNA, FLJ95846, highly similar to Homo sapiens serpin peptidase inhibitor, clade B (ovalbumin), member 10 (SERPINB10), mRNA	B2RC45	N/A	7.2191	0	3.8817	7.0351	0	3.9245	3.1611
cDNA, FLJ96792, highly similar to Homo sapiens calmodulin 2 (phosphorylase kinase, delta) (CALM2), mRNA	B2RDW0	N/A	5.1565	2.5472	5.8226	2.01	5.017	5.2327	3.1611
Chitotriosidase-1 GN=CHIT1	D6REY1	CHIT1	2.0626	1.6981	0.97043	2.01	2.5085	0	0.79027
Chloride intracellular channel protein	A0A1U9X8Y4	N/A	12.376	4.2453	7.7634	13.065	10.034	3.9245	9.4832
Chromobox homolog 3 (HP1 gamma homolog, Drosophila) GN=CBX3	A4D177	CBX3	0	0	0.97043	2.01	0	1.3082	0.79027
Clathrin heavy chain GN=CLTC	A0A087WVQ6	CLTC	7.2191	7.6416	6.793	4.02	6.2713	2.6164	7.9027
Clusterin	A0A384NKS6	N/A	2.0626	2.5472	1.9409	1.005	2.5085	3.9245	1.5805
Coatomer subunit delta GN=ARCN1	B0YIW5	ARCN1	0	0.84907	0.97043	0	0	0	0
Cofilin, non-muscle isoform GN=CFL1	E9PK25	CFL1	6.1878	3.3963	4.8521	5.025	7.5256	11.774	7.9027
Complement C3 GN=C3	P01024	C3	14.438	42.453	22.32	8.0401	15.051	13.082	21.337
Complement C4-A GN=C4A	P0C0L4	C4A	2.0626	7.6416	7.7634	3.015	3.7628	1.3082	9.4832
Copine III, isoform CRA_a GN=CPNE3	A0A024R994	CPNE3	2.0626	6.7925	5.8226	2.01	3.7628	6.5409	8.693
Core histone macro-H2A.1 GN=MACROH2A1	O75367	MACROH2A1	0	0	1.9409	2.01	0	1.3082	1.5805
Coronin GN=CORO1A	A0A024R611	CORO1A	19.595	12.736	15.527	13.065	17.56	18.314	18.966
CP protein GN=CP	A5PL27	CP	87.66	120.57	64.048	94.471	74.001	57.56	69.544
Cysteine-rich secretory protein 3 GN=CRISP3	J3KPA1	CRISP3	1.0313	0.84907	0	1.005	0	0	0
Cytidine deaminase GN=CDA	P32320	CDA	2.0626	3.3963	5.8226	1.005	5.017	10.465	3.9514
Cytochrome c (Fragment) GN=CYCS	C9JFR7	CYCS	1.0313	0	0.97043	0	0	0	0
Cytokeratin-1 GN=KRT1	H6VRF8	KRT1	53.627	125.66	73.753	87.436	75.256	22.239	132.77
D-dopachrome decarboxylase GN=DDT	P30046	DDT	0	0	0	1.005	1.2543	3.9245	0.79027
Delta globin GN=HBD	A0N071	HBD	10.313	6.7925	11.645	6.03	7.5256	5.2327	2.3708
Dermcidin GN=DCD	P81605	DCD	1.0313	0	2.9113	1.005	2.5085	7.8491	0
DNA-(apurinic or apyrimidinic site) endonuclease GN=APEX1	P27695	APEX1	1.0313	0	0	2.01	2.5085	2.6164	1.5805
EF-hand domain family, member D2, isoform CRA_a GN=EFHD2	A0A024QZ77	EFHD2	3.0939	0.84907	0.97043	2.01	3.7628	3.9245	2.3708
Elongation factor 1-alpha GN=EEF1A1	A0A087WV01	EEF1A1	2.0626	0.84907	2.9113	2.01	0	0	3.1611
Endoplasmic reticulum chaperone BiP GN=HSPA5	P11021	HSPA5	2.0626	0.84907	2.9113	2.01	3.7628	3.9245	5.5319
Eosinophil cationic protein GN=RNASE3	P12724	RNASE3	4.1252	5.9435	7.7634	6.03	5.017	5.2327	6.3222
Eosinophil peroxidase GN=EPX	P11678	EPX	4.1252	3.3963	0	8.0401	3.7628	0	4.7416
Epididymis luminal protein 176 GN=HEL-176	V9HVZ7	HEL-176	79.41	59.435	73.753	64.32	80.273	113.81	86.93
Epididymis luminal protein 4 GN=YWHAZ	D0PNI1	YWHAZ	8.2504	2.5472	4.8521	8.0401	11.288	10.465	7.9027
Epididymis luminal secretory protein 52 GN=EL52	K9JA46	EL52	4.1252	0.84907	4.8521	0	5.017	6.5409	3.1611
Epididymis secretory protein Li 37 GN=HEL-S-37	V9HWJ7	HEL-S-37	43.315	15.283	20.379	31.155	36.374	49.711	31.611
Epididymis secretory sperm binding protein (Fragment) GN=MIF	I4AY87	MIF	1.0313	0.84907	0	1.005	0	1.3082	0.79027
Epididymis secretory sperm binding protein (Fragment)	A0A384ME16	N/A	1.0313	0	0.97043	6.03	2.5085	2.6164	0.79027
Epididymis secretory sperm binding protein Li 44a GN=SERPINA1	E9KL23	SERPINA1	31.97	39.906	26.202	34.17	20.068	13.082	14.225
Epididymis secretory sperm binding protein GN=hCG_2043376	A0A024R0C8	hCG_2043376	0	0	0	1.005	1.2543	2.6164	0
Epididymis secretory sperm binding protein	A0A384NPW1	N/A	2.0626	0	1.9409	4.02	1.2543	3.9245	1.5805
Epididymis secretory sperm binding protein	A0A384MTY2	N/A	1.0313	0	0.97043	0	2.5085	1.3082	3.1611
Epididymis secretory sperm binding protein	A0A384MEJ3	N/A	1.0313	0	0.97043	1.005	0	0	0
ERO1-like protein alpha GN=ERO1A	G3V3E6	ERO1A	1.0313	0.84907	0	0	0	0	0
F-actin-capping protein subunit alpha	A8K0T9	N/A	3.0939	0	1.9409	0	2.5085	3.9245	3.9514
F-actin-capping protein subunit beta	A0A384MR50	N/A	7.2191	2.5472	7.7634	6.03	6.2713	5.2327	4.7416
Fermitin family homolog 3 GN=FERMT3	Q86UX7	FERMT3	3.0939	0.84907	1.9409	3.015	3.7628	5.2327	2.3708
Ferritin GN=FTL	A0A384MDR3	FTL	0	0.84907	0.97043	1.005	0	0	0
Fibronectin GN=FN1	A0A024R462	FN1	2.0626	5.9435	4.8521	7.0351	1.2543	1.3082	3.9514
Filaggrin-2 GN=FLG2	Q5D862	FLG2	0	1.6981	1.9409	1.005	1.2543	0	10.274
Filamin-A GN=FLNA	P21333	FLNA	59.815	45.85	68.9	55.275	57.696	81.107	43.465
Fructose-bisphosphate aldolase A GN=ALDOA	P04075	ALDOA	15.469	7.6416	14.556	13.065	25.085	23.547	19.757
Galectin-10 GN=CLC	Q05315	CLC	0	0	0	2.01	0	1.3082	1.5805
Gamma-enolase GN=ENO2	P09104	ENO2	3.0939	0	1.9409	2.01	1.2543	1.3082	3.1611
Gc-globulin GN=GC	D6RF35	GC	4.1252	8.4907	3.8817	2.01	5.017	2.6164	3.1611
GlcNAc kinase	A0A384N6G7	N/A	2.0626	0	1.9409	3.015	1.2543	2.6164	1.5805
Glia maturation factor gamma GN=GMFG	M0QYG8	GMFG	1.0313	0.84907	2.9113	2.01	1.2543	1.3082	0.79027
Glucose-6-phosphate 1-dehydrogenase	A0A384NL00	N/A	12.376	4.2453	4.8521	7.0351	10.034	5.2327	7.9027
Glucose-6-phosphate isomerase GN=GPI	A0A2U3TZU2	GPI	26.814	11.038	16.497	25.125	26.339	27.472	17.386
Glutathione reductase, mitochondrial GN=GSR	P00390	GSR	0	1.6981	2.9113	3.015	1.2543	1.3082	1.5805
Glutathione S-transferase P GN=GSTP1	P09211	GSTP1	8.2504	5.0944	4.8521	8.0401	8.7798	10.465	11.064
Glyceraldehyde-3-phosphate dehydrogenase (Fragment) GN=GAPDH	Q0QET7	GAPDH	10.313	5.9435	12.616	10.05	17.56	26.164	16.596
Glyceraldehyde-3-phosphate dehydrogenase GN=GAPDH	P04406	GAPDH	16.501	8.4907	19.409	16.08	25.085	34.013	23.708
Glycogen [starch] synthase, muscle GN=GYS1	P13807	GYS1	3.0939	7.6416	2.9113	1.005	3.7628	2.6164	5.5319
Glycogen phosphorylase, liver form GN=PYGL	P06737	PYGL	10.313	4.2453	15.527	11.055	11.288	5.2327	15.015
Grancalcin GN=GCA	H7BXD5	GCA	2.0626	0.84907	3.8817	3.015	5.017	2.6164	2.3708
Guanine nucleotide-binding protein G(i) subunit alpha-2 GN=GNAI2	P04899	GNAI2	2.0626	3.3963	2.9113	1.005	1.2543	1.3082	2.3708
Haptoglobin (Fragment) GN=HP	H3BS21	HP	12.376	24.623	19.409	8.0401	15.051	13.082	5.5319
Haptoglobin GN=HP	H0Y300	HP	19.595	42.453	33.965	11.055	21.322	23.547	16.596
HCG1745306, isoform CRA_a GN=HBA2	G3V1N2	HBA2	6.1878	5.0944	9.7043	4.02	8.7798	5.2327	0
HCG1991735, isoform CRA_a GN=hCG_1991735	A0A024RC65	hCG_1991735	10.313	3.3963	9.7043	2.01	1.2543	1.3082	3.9514
HCG2039812, isoform CRA_b (Fragment) GN=KRT6A	A0A0S2Z428	KRT6A	0	0	0	18.09	11.288	0	18.966
HCG40889, isoform CRA_b GN=hCG_40889	A0A024R962	hCG_40889	1.0313	5.9435	0	1.005	0	0	0.79027
Heat shock 70 kDa protein 1B GN=HSPA1B	A0A0G2JIW1	HSPA1B	15.469	5.9435	15.527	17.085	21.322	37.937	23.708
Heat shock cognate 71 kDa protein GN=HSPA8	E9PKE3	HSPA8	7.2191	1.6981	6.793	10.05	12.543	13.082	11.064
Heat shock protein 90kDa alpha (Cytosolic), class B member 1, isoform CRA_a GN=HSP90AB1	A0A024RD80	HSP90AB1	3.0939	0.84907	2.9113	1.005	3.7628	5.2327	3.1611
Hemopexin GN=HPX	P02790	HPX	2.0626	7.6416	5.8226	1.005	2.5085	1.3082	5.5319
Heterogeneous nuclear ribonucleoprotein D0 (Fragment) GN=HNRNPD	D6RAF8	HNRNPD	0	0	0	0	1.2543	1.3082	1.5805
Heterogeneous nuclear ribonucleoprotein U GN=HNRNPU	A0A1W2PP34	HNRNPU	0	0.84907	0.97043	0	0	0	0.79027
Hexokinase GN=HK3	A0A024R7R1	HK3	16.501	4.2453	8.7339	13.065	15.051	14.39	12.644
High mobility group protein 1 GN=HMGB1	A0A024RDR0	HMGB1	7.2191	0.84907	2.9113	9.0451	3.7628	2.6164	5.5319
High-mobility group box 2	Q5U071	N/A	18.563	6.7925	12.616	27.135	21.322	14.39	11.064
Histone 1, H1e GN=HIST1H1E	A3R0T8	HIST1H1E	1.0313	0.84907	2.9113	7.0351	2.5085	2.6164	0.79027
Histone H1.5 GN=H1-5	P16401	H1-5	1.0313	0.84907	1.9409	9.0451	3.7628	2.6164	2.3708
Histone H2B GN=HIST1H2BD	A0A024QZZ7	HIST1H2BD	2.0626	1.6981	1.9409	1.005	5.017	6.5409	0.79027
Hornerin GN=HRNR	Q86YZ3	HRNR	1.0313	5.9435	5.8226	6.03	2.5085	0	3.1611
Hypoxanthine phosphoribosyltransferase	A0A140VJL3	N/A	1.0313	0	0.97043	2.01	0	0	0
IG c1173_heavy_IGHV3-23_IGHD3-3_IGHJ6 (Fragment)	A0A5C2GQJ7	N/A	1.0313	0.84907	0	0	0	1.3082	0.79027
IgG H chain	S6BGE0	N/A	14.438	24.623	25.231	15.075	21.322	20.931	14.225
IGH c427_heavy__IGHV3-74_IGHD7-27_IGHJ4 (Fragment)	A0A5C2G716	N/A	2.0626	3.3963	0.97043	2.01	2.5085	2.6164	1.5805
IGK protein GN=IGK	Q6P5S8	IGK	29.908	45.001	35.906	23.115	30.102	18.314	26.079
IGL c1196_light_IGKV1-5_IGKJ1 (Fragment)	A0A5C2FYF1	N/A	1.0313	3.3963	0.97043	0	1.2543	0	0.79027
IGL c28_light_IGKV1-5_IGKJ1 (Fragment)	A0A5C2FSY5	N/A	0	0.84907	0.97043	0	0	0	0
IGL c2913_light_IGKV3-15_IGKJ3 (Fragment)	A0A5C2G944	N/A	1.0313	0.84907	0.97043	0	0	0	0.79027
IGL c382_light_IGKV3-20_IGKJ2 (Fragment)	A0A5C2FUF3	N/A	2.0626	3.3963	3.8817	1.005	1.2543	1.3082	1.5805
IGL c4161_light_IGKV4-1_IGKJ2 (Fragment)	A0A5C2G4D6	N/A	1.0313	3.3963	1.9409	0	1.2543	1.3082	0.79027
IGL protein GN=IGL	Q8N355	IGL	14.438	29.717	17.468	11.055	13.797	9.1572	15.015
IGL protein GN=IGL	Q6NS95	IGL	6.1878	15.283	9.7043	6.03	5.017	6.5409	8.693
Immunoglobulin alpha-2 heavy chain	P0DOX2	N/A	5.1565	8.4907	0.97043	5.025	3.7628	0	3.9514
Immunoglobulin heavy constant alpha 1 (Fragment) GN=IGHA1	A0A286YEY1	IGHA1	21.657	32.265	13.586	17.085	17.56	9.1572	16.596
Immunoglobulin heavy constant alpha 2 (Fragment) GN=IGHA2	A0A0G2JMB2	IGHA2	11.344	16.981	6.793	11.055	11.288	3.9245	7.9027
Immunoglobulin heavy constant gamma 3 (Fragment) GN=IGHG3	A0A286YES1	IGHG3	21.657	45.001	24.261	14.07	20.068	19.623	18.176
Immunoglobulin heavy constant gamma 4 (Fragment) GN=IGHG4	A0A286YFJ8	IGHG4	14.438	26.321	19.409	12.06	15.051	15.698	13.435
Immunoglobulin heavy constant mu GN=IGHM	P01871	IGHM	6.1878	15.283	7.7634	3.015	6.2713	1.3082	6.3222
Immunoglobulin J chain (Fragment) GN=JCHAIN	C9JA05	JCHAIN	1.0313	0.84907	0	0	0	0	0.79027
Immunoglobulin kappa constant (Fragment) GN=IGKC	A0A5H1ZRQ3	IGKC	22.689	31.415	21.349	14.07	18.814	11.774	16.596
Immunoglobulin kappa variable 2-28 GN=IGKV2-28	A0A075B6P5	IGKV2-28	1.0313	1.6981	0	0	0	0	0
Integrin alpha-M GN=ITGAM	P11215	ITGAM	2.0626	6.7925	5.8226	4.02	5.017	0	7.1124
Integrin beta GN=ITGB2	A0A494C0X7	ITGB2	12.376	11.887	3.8817	8.0401	3.7628	1.3082	7.1124
Inter-alpha (Globulin) inhibitor H4 (Plasma Kallikrein-sensitive glycoprotein) GN=ITIH4	B2RMS9	ITIH4	2.0626	4.2453	1.9409	1.005	1.2543	0	2.3708
Keratin, type I cytoskeletal 10 GN=KRT10	P13645	KRT10	38.158	51.793	49.492	43.215	33.865	11.774	72.705
Keratin, type I cytoskeletal 14 GN=KRT14	P02533	KRT14	9.2817	23.774	15.527	12.06	11.288	0	36.352
Keratin, type I cytoskeletal 16 GN=KRT16	P08779	KRT16	8.2504	13.585	9.7043	11.055	10.034	0	29.24
Keratin, type I cytoskeletal 9 GN=KRT9	P35527	KRT9	46.408	112.93	59.196	67.335	50.17	10.465	111.43
Keratin, type II cytoskeletal 2 epidermal GN=KRT2	P35908	KRT2	26.814	39.057	51.433	43.215	31.357	6.5409	65.592
Keratin, type II cytoskeletal 5 GN=KRT5	P13647	KRT5	6.1878	15.283	12.616	17.085	8.7798	2.6164	29.24
Keratin, type II cytoskeletal 6C GN=KRT6C	P48668	KRT6C	0	0	0	17.085	12.543	0	20.547
Lactotransferrin GN=LTF	A0A161I202	LTF	176.35	147.74	152.36	172.86	159.29	185.76	156.47
Lactotransferrin	B3VMW0	N/A	172.23	145.19	148.48	168.84	156.78	180.53	151.73
Lamin-B1 GN=LMNB1	P20700	LMNB1	2.0626	2.5472	4.8521	2.01	1.2543	2.6164	1.5805
Leucine rich repeat (In FLII) interacting protein 1, isoform CRA_c GN=LRRFIP1	A0A0F7NGI8	LRRFIP1	5.1565	1.6981	4.8521	2.01	1.2543	1.3082	1.5805
Leukotriene A(4) hydrolase	A0A140VK27	N/A	18.563	9.3397	10.675	18.09	13.797	17.006	17.386
L-lactate dehydrogenase A chain GN=LDHA	P00338	LDHA	14.438	5.9435	12.616	12.06	17.56	17.006	15.015
L-lactate dehydrogenase B chain GN=LDHB	P07195	LDHB	5.1565	0.84907	5.8226	9.0451	6.2713	7.8491	5.5319
Macrophage-capping protein	B2R9S4	N/A	2.0626	0.84907	5.8226	5.025	5.017	6.5409	5.5319
Major vault protein	B4DDR2	N/A	1.0313	4.2453	2.9113	0	0	0	2.3708
Malate dehydrogenase, cytoplasmic GN=MDH1	P40925	MDH1	1.0313	0.84907	0	0	1.2543	1.3082	1.5805
Matrix metalloproteinase-9 GN=MMP9	P14780	MMP9	11.344	11.038	17.468	9.0451	15.051	6.5409	6.3222
Metavinculin GN=VCL	A0A024QZN4	VCL	6.1878	0.84907	5.8226	17.085	10.034	7.8491	10.274
Mitofusin-2 GN=MFN2	A0A6Q8PGR2	MFN2	2.0626	0.84907	0	1.005	2.5085	2.6164	0.79027
Moesin (Fragment) GN=MSN	V9GZ54	MSN	0	0	0	6.03	0	7.8491	5.5319
Moesin GN=MSN	P26038	MSN	24.751	8.4907	12.616	36.18	21.322	28.78	23.708
Mutant hemoglobin alpha 2 globin chain GN=HBA2	A0A0K2BMD8	HBA2	11.344	10.189	15.527	9.0451	12.543	9.1572	3.9514
Myeloblastin GN=PRTN3	P24158	PRTN3	3.0939	3.3963	1.9409	7.0351	1.2543	1.3082	1.5805
Myeloid cell nuclear differentiation antigen GN=MNDA	P41218	MNDA	24.751	20.378	14.556	20.1	17.56	15.698	20.547
Myeloperoxidase GN=MPO	P05164	MPO	37.127	29.717	35.906	61.305	32.611	30.088	23.708
MYO1F variant protein	B0I1T1	N/A	1.0313	0.84907	0	1.005	1.2543	0	1.5805
Myosin light polypeptide 6 GN=MYL6	G8JLA2	MYL6	11.344	10.189	11.645	7.0351	16.305	13.082	10.274
Myosin regulatory light chain 12A GN=MYL12A	J3QRS3	MYL12A	5.1565	4.2453	6.793	2.01	3.7628	5.2327	3.1611
Myosin, heavy polypeptide 9, non-muscle, isoform CRA_a GN=MYH9	A0A024R1N1	MYH9	187.7	221.61	230.96	170.85	189.39	205.38	146.2
Neutrophil cytosolic factor 2 (65kDa, chronic granulomatous disease, autosomal 2), isoform CRA_a GN=NCF2	A0A024R936	NCF2	1.0313	0	0.97043	0	1.2543	0	0
Neutrophil defensin 1 GN=DEFA1	P59665	DEFA1	2.0626	1.6981	2.9113	3.015	1.2543	1.3082	0.79027
Neutrophil elastase GN=ELANE	P08246	ELANE	11.344	19.529	13.586	17.085	10.034	7.8491	10.274
Neutrophil gelatinase-associated lipocalin GN=NGAL	B2ZDQ1	NGAL	19.595	21.227	23.29	18.09	21.322	20.931	9.4832
Nicotinamide phosphoribosyltransferase GN=PBEF1	A0A024R718	PBEF1	2.0626	0.84907	5.8226	1.005	1.2543	2.6164	4.7416
Nucleolin GN=NCL	B3KM80	NCL	0	0	0	1.005	1.2543	1.3082	0.79027
Olfactomedin 4, isoform CRA_a GN=OLFM4	A0A024QZ95	OLFM4	1.0313	1.6981	1.9409	2.01	0	0	1.5805
Peptidoglycan recognition protein 1 GN=PGLYRP1	O75594	PGLYRP1	4.1252	4.2453	2.9113	2.01	5.017	2.6164	3.1611
Peptidyl-prolyl cis-trans isomerase B GN=PPIB	P23284	PPIB	2.0626	0	0	2.01	5.017	3.9245	0.79027
Peptidyl-prolyl cis-trans isomerase	A8K486	N/A	20.626	11.038	15.527	20.1	26.339	28.78	15.015
Peroxiredoxin-5 GN=HEL-S-55	V9HW35	HEL-S-55	2.0626	0	1.9409	2.01	3.7628	2.6164	3.9514
Peroxiredoxin-6 GN=PRDX6	P30041	PRDX6	0	0	0	2.01	1.2543	2.6164	0.79027
Phosphoglycerate kinase 1 GN=PGK1	P00558	PGK1	14.438	2.5472	9.7043	13.065	15.051	17.006	18.176
Phosphoglycerate mutase 1 GN=PGAM1	P18669	PGAM1	6.1878	3.3963	4.8521	5.025	6.2713	5.2327	6.3222
Phospholipase B-like 1 GN=PLBD1	Q6P4A8	PLBD1	1.0313	2.5472	1.9409	0	2.5085	1.3082	0.79027
Plasminogen GN=PLG	P00747	PLG	3.0939	11.887	3.8817	2.01	3.7628	2.6164	3.9514
Poly(rC)-binding protein 1 GN=PCBP1	Q15365	PCBP1	2.0626	0	1.9409	3.015	3.7628	3.9245	1.5805
Profilin-1 GN=PFN1	P07737	PFN1	17.532	8.4907	16.497	30.15	32.611	39.245	25.289
Proteasome subunit alpha type (Fragment) GN=PSMA4	H0YL69	PSMA4	1.0313	0	0.97043	1.005	0	0	0.79027
Proteasome subunit alpha type GN=PSMA2	A0A024RA52	PSMA2	0	1.6981	0.97043	1.005	0	0	3.1611
Proteasome subunit alpha type	A0A140VK44	N/A	2.0626	2.5472	4.8521	3.015	2.5085	3.9245	3.9514
Proteasome subunit alpha type	A0A140VK43	N/A	2.0626	0.84907	1.9409	1.005	1.2543	1.3082	0.79027
Proteasome subunit alpha type	A0A109NGN6	N/A	0	1.6981	2.9113	2.01	2.5085	3.9245	2.3708
Proteasome subunit alpha type-1 GN=PSMA1	F5GX11	PSMA1	0	2.5472	2.9113	1.005	3.7628	1.3082	2.3708
Proteasome subunit beta	A0A140VJS6	N/A	1.0313	0.84907	0.97043	0	1.2543	2.6164	0
Proteasome subunit beta	A0A140VK46	N/A	0	4.2453	2.9113	0	0	0	0.79027
Protein AMBP GN=AMBP	P02760	AMBP	13.407	13.585	13.586	13.065	15.051	11.774	8.693
Protein disulfide-isomerase GN=P4HB	A0A024R8S5	P4HB	3.0939	2.5472	3.8817	4.02	5.017	3.9245	7.9027
Protein S100-A11 GN=S100A11	P31949	S100A11	10.313	3.3963	7.7634	8.0401	8.7798	7.8491	5.5319
Protein S100-A12 GN=S100A12	P80511	S100A12	31.97	10.189	23.29	43.215	26.339	20.931	18.176
Protein S100-A4 GN=S100A4	P26447	S100A4	3.0939	0	2.9113	3.015	2.5085	0	0
Protein S100-A6 GN=S100A6	P06703	S100A6	15.469	6.7925	8.7339	14.07	10.034	9.1572	6.3222
Protein S100-A8 GN=S100A8	P05109	S100A8	166.04	63.68	85.398	198.99	120.41	124.28	105.9
Protein S100-A9 GN=S100A9	P06702	S100A9	182.54	77.265	95.102	218.09	134.21	116.43	88.51
Protein S100-P GN=S100P	P25815	S100P	15.469	5.0944	8.7339	11.055	7.5256	9.1572	7.1124
Protein-arginine deiminase	B4DIU3	N/A	1.0313	0.84907	0.97043	1.005	0	0	0
Protein-arginine deiminase type-4 GN=PADI4	Q9UM07	PADI4	8.2504	1.6981	0	4.02	0	1.3082	4.7416
Prothrombin (Fragment) GN=F2	C9JV37	F2	2.0626	5.0944	2.9113	2.01	2.5085	2.6164	2.3708
Purine nucleoside phosphorylase GN=PNP	P00491	PNP	1.0313	0.84907	1.9409	8.0401	5.017	7.8491	3.1611
Putative neutrophil cytosol factor 1B GN=NCF1B	A6NI72	NCF1B	5.1565	1.6981	2.9113	6.03	7.5256	10.465	5.5319
Putative nucleoside diphosphate kinase GN=NME2P1	O60361	NME2P1	2.0626	0.84907	0	2.01	2.5085	2.6164	1.5805
Pyridoxal kinase GN=PDXK	F2Z2Y4	PDXK	2.0626	1.6981	0	2.01	0	0	1.5805
Pyruvate kinase PKM GN=PKM	P14618	PKM	29.908	11.038	31.054	35.175	47.662	62.793	37.143
Rab GDP dissociation inhibitor	B4DLV7	N/A	3.0939	0.84907	1.9409	4.02	1.2543	5.2327	7.9027
Ras-related C3 botulinum toxin substrate 2 (Rho family, small GTP binding protein Rac2), isoform CRA_a GN=RAC2	A0A024R1P2	RAC2	0	0.84907	0.97043	1.005	0	1.3082	3.1611
Ras-related protein Rab-10 GN=RAB10	P61026	RAB10	0	0.84907	0.97043	0	0	0	0.79027
Resistin GN=RETN	Q9HD89	RETN	4.1252	3.3963	2.9113	2.01	3.7628	5.2327	1.5805
Rheumatoid factor D5 light chain (Fragment) GN=V-kappa-3	A0N5G5	V-kappa-3	0	2.5472	0	0	1.2543	1.3082	1.5805
Rheumatoid factor RF-ET12 (Fragment)	A2J1N9	N/A	1.0313	1.6981	1.9409	0	2.5085	0	0
Rheumatoid factor RF-ET6 (Fragment)	A2J1N5	N/A	0	2.5472	0.97043	0	0	0	1.5805
Rho GDP dissociation inhibitor (GDI) beta, isoform CRA_a GN=ARHGDIB	A0A024RAS5	ARHGDIB	10.313	3.3963	7.7634	12.06	15.051	22.239	14.225
Rho GDP-dissociation inhibitor 1 (Fragment) GN=ARHGDIA	J3KTF8	ARHGDIA	2.0626	0.84907	1.9409	2.01	1.2543	1.3082	0
Ribonuclease inhibitor GN=RNH1	A0A024RC87	RNH1	4.1252	0	0.97043	2.01	2.5085	0	4.7416
Serine/threonine-protein phosphatase CPPED1 GN=CPPED1	Q9BRF8	CPPED1	1.0313	0	0	0	1.2543	1.3082	0.79027
Serpin peptidase inhibitor clade G member 1 GN=SERPING1	A0A348GSH7	SERPING1	0	1.6981	0.97043	0	0	0	0.79027
Serpin peptidase inhibitor, clade A (Alpha-1 antiproteinase, antitrypsin), member 3, isoform CRA_c GN=SERPINA3	A0A024R6P0	SERPINA3	16.501	22.925	16.497	10.05	23.831	18.314	11.854
Serum amyloid P-component GN=APCS	P02743	APCS	9.2817	10.189	12.616	12.06	11.288	10.465	7.1124
SH3 domain binding glutamic acid-rich protein like 3, isoform CRA_a (Fragment) GN=SH3BGRL3	D3DPK5	SH3BGRL3	0	0	2.9113	1.005	1.2543	3.9245	3.1611
SH3 domain-binding glutamic acid-rich-like protein GN=SH3BGRL	O75368	SH3BGRL	1.0313	0	0.97043	4.02	0	0	2.3708
Small cytidine deaminase	Q6GV32	N/A	1.0313	0.84907	0	0	1.2543	1.3082	0
Small ubiquitin-related modifier GN=SUMO2	A0A024R8S3	SUMO2	1.0313	0.84907	0.97043	1.005	1.2543	1.3082	0.79027
Spectrin beta chain GN=SPTBN1	B2ZZ89	SPTBN1	1.0313	2.5472	0.97043	3.015	0	0	0.79027
Spectrin, alpha, non-erythrocytic 1 (Alpha-fodrin), isoform CRA_g GN=SPTAN1	A0A024R889	SPTAN1	2.0626	1.6981	1.9409	3.015	7.5256	2.6164	4.7416
Stomatin, isoform CRA_a GN=STOM	A0A024R882	STOM	1.0313	5.9435	2.9113	2.01	0	0	1.5805
Superoxide dismutase [Cu-Zn] GN=SOD1	P00441	SOD1	1.0313	0.84907	0	1.005	1.2543	0	0
T cell receptor alpha joining 56 (Fragment) GN=TRAJ56	A0A075B6Z2	TRAJ56	13.407	8.4907	7.7634	7.0351	12.543	10.465	5.5319
Talin-1 GN=TLN1	A0A1S5UZ07	TLN1	2.0626	2.5472	7.7634	7.0351	5.017	11.774	11.854
T-box 3 (Ulnar mammary syndrome), isoform CRA_c GN=TBX3	A0A024RBL6	TBX3	0	0.84907	0.97043	0	0	0	0.79027
T-complex protein 1 subunit theta GN=CCT8	P50990	CCT8	0	0	0	0	1.2543	2.6164	0.79027
Testicular tissue protein Li 227	A0A140VK00	N/A	0	1.6981	0.97043	0	0	2.6164	0.79027
Thioredoxin GN=TXN	H9ZYJ2	TXN	7.2191	2.5472	5.8226	10.05	6.2713	3.9245	4.7416
Transaldolase	A0A140VK56	N/A	19.595	4.2453	9.7043	13.065	11.288	13.082	10.274
Transketolase GN=TKT	P29401	TKT	83.535	56.038	57.255	94.471	71.493	77.182	60.851
Transthyretin GN=TTR	A0A087WT59	TTR	6.1878	8.4907	8.7339	4.02	3.7628	3.9245	3.9514
Triosephosphate isomerase GN=TPI1	P60174	TPI1	40.221	16.981	24.261	36.18	33.865	32.704	22.128
Tripeptidyl-peptidase 2 (Fragment) GN=TPP2	A0A494C0U1	TPP2	1.0313	0	0.97043	1.005	1.2543	1.3082	0.79027
Tropomyosin 3 isoform 1 (Fragment) GN=TPM3	A0A0S2Z4G4	TPM3	2.0626	0.84907	2.9113	1.005	2.5085	5.2327	1.5805
Tubulin alpha chain	B3KPS3	N/A	6.1878	5.9435	3.8817	4.02	3.7628	3.9245	5.5319
Tubulin alpha-3C chain GN=TUBA3C	P0DPH7	TUBA3C	3.0939	2.5472	1.9409	0	2.5085	3.9245	2.3708
Tubulin beta chain (Fragment)	A0A384NYT8	N/A	4.1252	2.5472	2.9113	2.01	2.5085	3.9245	7.1124
Tubulin beta-4B chain GN=TUBB4B	P68371	TUBB4B	4.1252	2.5472	2.9113	2.01	2.5085	3.9245	6.3222
Tyrosine 3-monooxygenase/tryptophan 5-monooxygenase activation protein, eta polypeptide, isoform CRA_b GN=YWHAH	A0A024R1K7	YWHAH	2.0626	0	0	4.02	0	3.9245	2.3708
Tyrosine-protein phosphatase non-receptor type 6 GN=PTPN6	P29350	PTPN6	6.1878	0.84907	3.8817	6.03	2.5085	0	1.5805
Ubiquitin-activating enzyme E1 GN=UBE1	A0A024R1A3	UBE1	1.0313	0	0	1.005	0	1.3082	1.5805
Uncharacterized protein (Fragment)	Q96DE1	N/A	61.878	48.397	59.196	39.195	70.239	102.04	71.915
Uncharacterized protein DKFZp686I04196 (Fragment) GN=DKFZp686I04196	Q6N093	DKFZp686I04196	18.563	43.302	33.965	21.105	20.068	14.39	19.757
Uncharacterized protein	A8K008	N/A	31.97	56.038	49.492	30.15	37.628	36.629	27.659
Uncharacterized protein	Q8NEJ1	N/A	12.376	27.17	16.497	10.05	11.288	9.1572	12.644
UTP--glucose-1-phosphate uridylyltransferase GN=UGP2	A0A087WYS1	UGP2	0	0.84907	2.9113	1.005	0	1.3082	2.3708
Vasodilator-stimulated phosphoprotein isoform 1 GN=VASP	A0A024R0V4	VASP	3.0939	3.3963	1.9409	8.0401	5.017	5.2327	3.1611
Vesicle amine transport protein 1 homolog (T californica), isoform CRA_a GN=VAT1	A0A024R1Z6	VAT1	1.0313	0	1.9409	2.01	2.5085	1.3082	0
Vimentin GN=VIM	B0YJC4	VIM	43.315	26.321	37.847	31.155	40.136	61.484	26.869
Vitronectin GN=VTN	D9ZGG2	VTN	2.0626	5.0944	1.9409	3.015	5.017	1.3082	2.3708
WD repeat domain 1, isoform CRA_a (Fragment) GN=WDR1	Q53GN4	WDR1	5.1565	0	4.8521	8.0401	2.5085	6.5409	14.225

## Sheet: Table S3
			Normalized abundance values
			Healthy controls			T1D
Protein description	Protein Accessions	Gene name	HC1	HC2	HC3	T1D1	T1D2	T1D3	T1D4	P-value	Fold change
6-phosphogluconate dehydrogenase, decarboxylating OS=Homo sapiens OX=9606 PE=2 SV=1	B4DL86	B4DL86	7.44778e+06	1.39469e+07	1.29167e+07	1.90938e+07	2.32272e+07	1.48028e+07	1.86511e+07	0.0363709	1.65634
Actin, cytoplasmic 1 (Fragment) OS=Homo sapiens OX=9606 GN=ACTB PE=1 SV=1	A0A2R8YGF8	ACTB	5.39363e+07	9.17189e+07	6.23611e+07	1.1261e+08	1.97775e+08	1.539e+08	1.67272e+08	0.0119884	2.27707
Actin, cytoplasmic 1 (Fragment) OS=Homo sapiens OX=9606 GN=ACTB PE=1 SV=1	A0A2R8YEA7	ACTB	322205	1.94466e+06	252331	2.61044e+06	5.10718e+06	3.98977e+06	3.37665e+06	0.0129623	4.49073
Actin-depolymerizing factor OS=Homo sapiens OX=9606 PE=2 SV=1	B7Z2X4	B7Z2X4	6.38403e+06	1.08975e+07	1.27027e+07	1.60179e+07	2.28273e+07	1.53211e+07	1.95064e+07	0.0224008	1.84279
Annexin A1 OS=Homo sapiens OX=9606 GN=ANXA1 PE=1 SV=2	P04083	ANXA1	7.96557e+06	3.49653e+07	1.5628e+07	4.83321e+07	5.42472e+07	4.61116e+07	5.0459e+07	0.00765934	2.55064
Apoptosis regulator BAX OS=Homo sapiens OX=9606 GN=BAX PE=1 SV=1	Q07812	BAX	72773.4	91841.6	44901.2	115132	193036	117233	221198	0.0418909	2.31461
Arginase-1 OS=Homo sapiens OX=9606 GN=ARG1 PE=1 SV=2	P05089	ARG1	372164	352608	229249	1.13832e+06	1.08852e+06	830751	685645	0.00547874	2.94273
Azurocidin OS=Homo sapiens OX=9606 GN=AZU1 PE=1 SV=3	P20160	AZU1	9.64734e+06	1.37255e+07	2.21771e+07	4.03736e+06	4.8868e+06	4.38604e+06	6.79711e+06	0.023937	0.331076
Copine III, isoform CRA_a OS=Homo sapiens OX=9606 GN=CPNE3 PE=3 SV=1	A0A024R994	CPNE3	1.22532e+06	1.76906e+06	1.37361e+06	823955	767832	923746	1.19754e+06	0.0304749	0.637548
Core histone macro-H2A.1 OS=Homo sapiens OX=9606 GN=MACROH2A1 PE=1 SV=4	O75367	MACROH2A1	91327.1	211892	74233.8	439730	748057	468805	446339	0.00847097	4.17853
Drebrin-like protein OS=Homo sapiens OX=9606 GN=DBNL PE=1 SV=1	B4DDD6	DBNL	22949.5	145926	43552	178724	148824	326067	335067	0.0435645	3.49065
Epididymis luminal protein 176 OS=Homo sapiens OX=9606 GN=HEL-176 PE=2 SV=1	V9HVZ7	HEL-176	2.82484e+06	3.66533e+06	3.63831e+06	7.47148e+06	6.00016e+06	5.1436e+06	6.7057e+06	0.00543914	1.87498
Fructose-bisphosphate aldolase A OS=Homo sapiens OX=9606 GN=ALDOA PE=1 SV=2	P04075	ALDOA	9.4254e+06	1.87971e+07	1.6052e+07	2.68491e+07	3.85756e+07	2.04537e+07	3.01583e+07	0.0366104	1.96563
Glutaredoxin (Thioltransferase), isoform CRA_c OS=Homo sapiens OX=9606 GN=GLRX PE=4 SV=1	A0A024RAM2	GLRX	32320.3	77283.1	122067	216124	204212	163765	292263	0.0141517	2.83711
Glutathione S-transferase P OS=Homo sapiens OX=9606 GN=GSTP1 PE=1 SV=2	P09211	GSTP1	1.42564e+07	1.74653e+07	1.44861e+07	2.62705e+07	2.3848e+07	1.72185e+07	2.96648e+07	0.0408194	1.57444
Glyceraldehyde-3-phosphate dehydrogenase OS=Homo sapiens OX=9606 GN=GAPDH PE=1 SV=3	P04406	GAPDH	6.43914e+06	1.00479e+07	9.27379e+06	1.52687e+07	2.0494e+07	1.5893e+07	1.96205e+07	0.00369703	2.07513
Heterogeneous nuclear ribonucleoprotein H3 (2H9), isoform CRA_a OS=Homo sapiens OX=9606 GN=HNRPH3 PE=4 SV=1	A0A024QZK8	HNRPH3	6171.33	8841.28	1891.08	15431	22294.6	28199.4	31499.2	0.00889469	4.32261
High mobility group protein B2 OS=Homo sapiens OX=9606 GN=HMGB2 PE=1 SV=2	P26583	HMGB2	6.71171e+06	6.56239e+06	7.39918e+06	6.15998e+06	2.90454e+06	4.1573e+06	2.31356e+06	0.0329364	0.563603
Malate dehydrogenase, cytoplasmic OS=Homo sapiens OX=9606 GN=MDH1 PE=1 SV=4	P40925	MDH1	41502.8	174678	24534.1	415527	605215	384415	377347	0.00460398	5.55379
Moesin OS=Homo sapiens OX=9606 GN=MSN PE=1 SV=3	P26038	MSN	1.19004e+07	1.36485e+07	1.45972e+07	1.00494e+07	7.05099e+06	1.08351e+07	9.41826e+06	0.0181006	0.697835
Neutrophil cytosol factor 1 OS=Homo sapiens OX=9606 GN=NCF1 PE=1 SV=4	P14598	NCF1	1.30702e+06	2.0496e+06	2.2276e+06	4.27658e+06	2.61596e+06	3.46568e+06	3.72735e+06	0.0170237	1.89179
Neutrophil elastase OS=Homo sapiens OX=9606 GN=ELANE PE=1 SV=1	P08246	ELANE	1.20525e+07	1.98659e+07	2.83505e+07	4.8824e+06	5.63473e+06	4.55711e+06	9.33245e+06	0.019826	0.303722
Peptidyl-prolyl cis-trans isomerase OS=Homo sapiens OX=9606 PE=2 SV=1	A8K486	PPIA	2.11582e+07	2.56531e+07	3.51922e+07	4.19528e+07	5.43049e+07	3.87978e+07	4.66795e+07	0.0187015	1.66214
Peroxiredoxin-5 OS=Homo sapiens OX=9606 GN=HEL-S-55 PE=2 SV=1	V9HW35	HEL-S-55	540875	723543	642333	1.34199e+06	1.31392e+06	1.01933e+06	1.06426e+06	0.00382009	1.86423
Phosphoglycerate kinase 1 OS=Homo sapiens OX=9606 GN=PGK1 PE=1 SV=3	P00558	PGK1	6.07151e+06	1.09672e+07	7.27555e+06	1.68546e+07	1.52919e+07	1.23365e+07	1.09086e+07	0.0362683	1.70861
Profilin-1 OS=Homo sapiens OX=9606 GN=PFN1 PE=1 SV=2	P07737	PFN1	1.73263e+07	2.09392e+07	3.21495e+07	5.40019e+07	4.73884e+07	2.78983e+07	5.26955e+07	0.0411666	1.93834
Proteasome subunit alpha type OS=Homo sapiens OX=9606 PE=2 SV=1	A0A109NGN6	PSMA5	38616.4	154370	46639.5	273529	252149	211249	186369	0.0116788	2.88981
Proteasome subunit alpha type OS=Homo sapiens OX=9606 PE=2 SV=1	A0A140VK44	PSMA6	149108	342205	227512	479160	483334	326312	547398	0.0294443	1.91584
Protein S100-A11 OS=Homo sapiens OX=9606 GN=S100A11 PE=1 SV=2	P31949	S100A11	1.22932e+07	1.01995e+07	1.26236e+07	1.06966e+07	7.90346e+06	6.33095e+06	8.09154e+06	0.0392469	0.705285
Protein S100-A12 OS=Homo sapiens OX=9606 GN=S100A12 PE=1 SV=2	P80511	S100A12	3.88568e+07	2.9435e+07	3.87931e+07	4.64187e+07	6.01801e+07	4.59119e+07	6.26474e+07	0.0272478	1.50692
Protein S100-A6 OS=Homo sapiens OX=9606 GN=S100A6 PE=1 SV=1	P06703	S100A6	4.52714e+07	3.53075e+07	3.8912e+07	1.6076e+07	2.0394e+07	1.51204e+07	1.99084e+07	0.000640265	0.448772
Protein S100-P OS=Homo sapiens OX=9606 GN=S100P PE=1 SV=2	P25815	S100P	1.99321e+07	1.89242e+07	3.02631e+07	1.15125e+07	1.17475e+07	9.53293e+06	1.69232e+07	0.0307954	0.539459
Purine nucleoside phosphorylase OS=Homo sapiens OX=9606 GN=PNP PE=1 SV=2	P00491	PNP	1.41355e+06	1.36877e+06	1.53358e+06	2.76715e+06	2.68605e+06	2.1456e+06	3.18415e+06	0.00441998	1.87382
Pyruvate kinase PKM OS=Homo sapiens OX=9606 GN=PKM PE=1 SV=4	P14618	PKM	1.44011e+07	2.64482e+07	2.78875e+07	3.28635e+07	4.91935e+07	3.39274e+07	4.6847e+07	0.034524	1.77668
RAB7, member RAS oncogene family, isoform CRA_a OS=Homo sapiens OX=9606 GN=RAB7A PE=2 SV=1	A0A158RFU6	RAB7A	181246	345472	106296	529482	789045	537187	811078	0.00856539	3.15963
Rho GDP dissociation inhibitor (GDI) beta, isoform CRA_a OS=Homo sapiens OX=9606 GN=ARHGDIB PE=3 SV=1	A0A024RAS5	ARHGDIB	4.37348e+06	8.26019e+06	6.51849e+06	1.39014e+07	1.7962e+07	1.7522e+07	1.95259e+07	0.00137356	2.69857
Rho GDP-dissociation inhibitor 1 OS=Homo sapiens OX=9606 GN=ARHGDIA PE=1 SV=3	P52565	ARHGDIA	1.05517e+06	2.26313e+06	2.24245e+06	3.12493e+06	3.18893e+06	2.93014e+06	3.72386e+06	0.0161843	1.74903
Serine/arginine-rich-splicing factor 3 OS=Homo sapiens OX=9606 GN=SRSF3 PE=1 SV=1	A0A087X2D0	SRSF3	117300	177747	76493.4	244461	181745	252894	290532	0.0223146	1.95732
Thioredoxin OS=Homo sapiens OX=9606 GN=TXN PE=2 SV=1	H9ZYJ2,P10599	TXN	6.11896e+06	9.70165e+06	7.95042e+06	1.41435e+07	1.80491e+07	1.60882e+07	1.17298e+07	0.0114792	1.89339
Tropomyosin 3 isoform 1 (Fragment) OS=Homo sapiens OX=9606 GN=TPM3 PE=2 SV=1	A0A0S2Z4G	TPM3	209114	254523	520456	693407	493439	516766	713107	0.0479441	1.84184
Tubulin alpha-1A chain OS=Homo sapiens OX=9606 GN=TUBA1A PE=1 SV=1	Q71U36	TUBA1A	439737	751023	419331	1.10667e+06	814046	898191	1.5196e+06	0.0454906	2.02093
Tubulin beta chain OS=Homo sapiens OX=9606 GN=TUBB PE=1 SV=2	P07437	TUBB	159776	226004	128454	411602	366092	360245	232032	0.021093	1.99808
Tubulin beta-4B chain OS=Homo sapiens OX=9606 GN=TUBB4B PE=1 SV=1	P68371	TUBB4B	626247	1.12082e+06	490566	1.60339e+06	1.52486e+06	1.96407e+06	2.93669e+06	0.0289509	2.69114
Tubulin-specific chaperone A OS=Homo sapiens OX=9606 GN=TBCA PE=1 SV=1	E5RIW3	TBCA	106201	44406.3	95257.6	41313.8	20959.2	29253.5	11579.1	0.0241779	0.314519

## Sheet: Table S4
			Normalized abundance values
			Healthy controls			T1D
Protein description	Protein Accessions	Gene name	HC1	HC2	HC3	T1D1	T1D2	T1D3	T1D4	P-value	Fold change
Actin, cytoplasmic 1 (Fragment) OS=Homo sapiens OX=9606 GN=ACTB PE=1 SV=1	A0A2R8Y793	ACTB	1.05609e+08	9.23797e+07	1.36167e+08	1.45138e+08	1.46446e+08	1.45107e+08	1.89625e+08	0.0446431	1.40574
Alpha-1-antichymotrypsin (Fragment) OS=Homo sapiens OX=9606 GN=SERPINA3 PE=1 SV=3	G3V595	SERPINA3	202767	389185	191643	96903.3	1317.82	41800.5	115378	0.0242279	0.24445
Annexin A11 OS=Homo sapiens OX=9606 GN=ANXA11 PE=1 SV=1	P50995	ANXA11	88737.6	184418	219569	340103	377095	256346	294845	0.0195791	1.93068
Beta-globin OS=Homo sapiens OX=9606 GN=HBB PE=3 SV=1	D9YZU5	HBB	665682	437127	663662	301011	73895.3	163034	136439	0.0043312	0.286325
D-dopachrome decarboxylase OS=Homo sapiens OX=9606 GN=DDT PE=1 SV=3	P30046	DDT	230708	175607	267281	527242	447291	514611	259194	0.0389541	1.94665
DNA-(apurinic or apyrimidinic site) endonuclease OS=Homo sapiens OX=9606 GN=APEX1 PE=1 SV=2	P27695	APEX1	85258.7	57997.4	34861.7	179147	236297	80084.1	202723	0.0393719	2.94012
Epididymis luminal protein 176 OS=Homo sapiens OX=9606 GN=HEL-176 PE=2 SV=1	V9HVZ7	HEL-176	5.52932e+06	3.81889e+06	7.54318e+06	9.70156e+06	8.58928e+06	8.17271e+06	9.70819e+06	0.0198943	1.60607
Glutathione S-transferase P OS=Homo sapiens OX=9606 GN=GSTP1 PE=1 SV=2	P09211	GSTP1	4.0906e+06	1.79806e+06	2.53582e+06	5.48411e+06	4.15925e+06	4.35625e+06	5.33344e+06	0.0326342	1.72115
Glyceraldehyde-3-phosphate dehydrogenase OS=Homo sapiens OX=9606 GN=GAPDH PE=1 SV=3	P04406	GAPDH	6.3022e+06	3.29302e+06	7.39506e+06	6.9171e+06	1.14951e+07	1.34126e+07	1.30566e+07	0.0418156	1.98119
Guanine nucleotide-binding protein G(i) subunit alpha-2 OS=Homo sapiens OX=9606 GN=GNAI2 PE=1 SV=3	P04899	GNAI2	218555	261840	254059	196265	202497	181239	207302	0.0141488	0.803968
Haptoglobin (Fragment) OS=Homo sapiens OX=9606 GN=HP PE=1 SV=1	H3BS21	HP	3.46096e+06	8.76716e+06	6.17588e+06	3.30046e+06	2.09383e+06	1.58437e+06	1.95034e+06	0.0345971	0.363875
Heterogeneous nuclear ribonucleoprotein D0 (Fragment) OS=Homo sapiens OX=9606 GN=HNRNPD PE=1 SV=1	D6RAF8	HNRNPD	14370.2	7881.04	4822.89	25459.1	99965.5	129487	77579	0.0421233	9.21058
Hexokinase OS=Homo sapiens OX=9606 GN=HK3 PE=3 SV=1	A0A024R7R1	HK3	1.83655e+06	796449	1.29779e+06	2.22739e+06	1.92608e+06	2.21719e+06	2.44414e+06	0.0245497	1.68187
Peptidoglycan recognition protein 1 OS=Homo sapiens OX=9606 GN=PGLYRP1 PE=1 SV=1	O75594	PGLYRP1	974708	921159	907544	449418	824534	647352	611906	0.0226708	0.677713
Peroxiredoxin-5 OS=Homo sapiens OX=9606 GN=HEL-S-55 PE=2 SV=1	V9HW35	HEL-S-55	177686	94813	157439	292173	304641	357629	267193	0.00326056	2.13107
Peroxiredoxin-6 OS=Homo sapiens OX=9606 GN=PRDX6 PE=1 SV=3	P30041	PRDX6	34000.6	48109.2	70348.2	166535	116127	104100	122304	0.008851	2.50429
Phosphoglycerate kinase 1 OS=Homo sapiens OX=9606 GN=PGK1 PE=1 SV=3	P00558	PGK1	3.45842e+06	1.6541e+06	3.20169e+06	5.35269e+06	4.85558e+06	4.80354e+06	5.29692e+06	0.00584061	1.83199
Phosphoglycerate mutase 1 OS=Homo sapiens OX=9606 GN=PGAM1 PE=1 SV=2	P18669	PGAM1	1.65161e+06	771862	1.50267e+06	2.85181e+06	2.00673e+06	1.87587e+06	2.39761e+06	0.0370509	1.74446
Profilin-1 OS=Homo sapiens OX=9606 GN=PFN1 PE=1 SV=2	P07737	PFN1	6.13391e+06	4.65248e+06	1.01206e+07	2.32498e+07	1.30981e+07	1.32309e+07	1.74387e+07	0.0263204	2.40413
Proteasome subunit beta OS=Homo sapiens OX=9606 PE=2 SV=1	A0A140VJS6	PSMB2	239972	253366	238867	182437	147969	198683	194284	0.00656037	0.740954
Protein AMBP OS=Homo sapiens OX=9606 GN=AMBP PE=1 SV=1	P02760	AMBP	4.92484e+06	7.03629e+06	5.77233e+06	4.33324e+06	4.13875e+06	2.86305e+06	3.85048e+06	0.021669	0.64224
Purine nucleoside phosphorylase OS=Homo sapiens OX=9606 GN=PNP PE=1 SV=2	P00491	PNP	167624	86600.3	205908	784022	495305	477895	466057	0.00818457	3.62387
Putative neutrophil cytosol factor 1B OS=Homo sapiens OX=9606 GN=NCF1B PE=5 SV=2	A6NI72	NCF1B	481277	316411	902505	1.18817e+06	987845	1.04156e+06	1.31278e+06	0.0207791	1.99846
Rho GDP dissociation inhibitor (GDI) beta, isoform CRA_a OS=Homo sapiens OX=9606 GN=ARHGDIB PE=3 SV=1	A0A024RAS5	ARHGDIB	2.64134e+06	1.28672e+06	3.4521e+06	4.11542e+06	4.61491e+06	7.12848e+06	7.45673e+06	0.0317111	2.36942
Talin-1 OS=Homo sapiens OX=9606 GN=TLN1 PE=2 SV=1	A0A1S5UZ0	TLN1	327506	266226	659137	764890	636893	1.03993e+06	935165	0.033712	2.02149
T-complex protein 1 subunit theta OS=Homo sapiens OX=9606 GN=CCT8 PE=1 SV=4	P50990	CCT8	45174.5	36942	31575.7	58400.3	70228.8	84433.9	98463.6	0.0139319	2.05507
UTP--glucose-1-phosphate uridylyltransferase OS=Homo sapiens OX=9606 GN=UGP2 PE=1 SV=1	A0A087WYS1	UGP2	116014	102863	184323	178109	272285	223314	245213	0.0296586	1.7093
